RESEARCH ARTICLE

# Constraining the population size estimates of the pre-Columbian Casarabe Culture of Amazonian Bolivia

Joseph Hirst<sup>1\*</sup>, Joy S. Singarayer<sup>2</sup>, Umberto Lombardo<sup>3</sup>, Francis Mayle<sup>1</sup>

**1** Department of Geography and Environmental Science, School of Archaeology, Geography and Environmental Science, University of Reading, Whiteknights, Reading, United Kingdom, **2** Department of Meteorology, School of Mathematical, Physical, and Computational Sciences, Earley Gate, University of Reading, Reading, United Kingdom, **3** Department of Prehistory, Institut de Ciència i Tecnologia Ambientals (ICTA-UAB), Universitat Autònoma de Barcelona, Edifici ICTA-UAB, Cerdanyola de Vallès, Barcelona, Spain

\* [jhirst2018@gmail.com](mailto:jhirst2018@gmail.com)

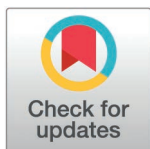

## OPEN ACCESS

**Citation:** Hirst J, Singarayer J, Lombardo U, Mayle F (2025) Constraining the population size estimates of the pre-Columbian Casarabe Culture of Amazonian Bolivia. PLoS One 20(5): e0325104. <https://doi.org/10.1371/journal.pone.0325104>

**Editor:** Raven Garvey, University of Michigan, UNITED STATES OF AMERICA

**Received:** September 20, 2024

**Accepted:** May 7, 2025

**Published:** May 30, 2025

**Copyright:** © 2025 Hirst et al. This is an open access article distributed under the terms of the [Creative Commons Attribution License](https://creativecommons.org/licenses/by/4.0/), which permits unrestricted use, distribution, and reproduction in any medium, provided the original author and source are credited.

**Data availability statement:** The architectural energetics and carrying capacity models developed in this study, along with their outputs, have been made available in the supporting information files. Our agent-based model, MoundSim Population, as well as the parameter data necessary to replicate our experiment

## Abstract

The capacity of Amazonian environments to support large indigenous societies prior to European Contact has long been a contentious area of debate, particularly in regions where pre-Columbian cultures are known to have constructed large, spatially complex earthworks. Here, we provide the first range of supported population estimates for the Casarabe Culture of the Bolivian Llanos de Moxos – one of the most complex pre-Columbian societies yet documented in Amazonia. Between 400 and 1400 CE, the Casarabe Culture inhabited this forest-savanna mosaic landscape, where they constructed hundreds of monumental habitation mounds, integrated by a dense network of causeways and canals, suggesting the former presence of a large, sedentary society. To estimate the population size of this culture, we employed a multifaceted modelling approach – including architectural energetics, maximum carrying capacity, and agent-based modelling – which considers: (i) the number of people needed to build these earthworks; (ii) how many people the local environment could support; and (iii) how their population grew and spread over time. Our results indicate that the Casarabe Culture likely grew to a maximum population of between 10,000 and 100,000 people within a 5020 km<sup>2</sup> quadrant of their former territory, representing a density of between 2 and 20 people km<sup>-2</sup>. These values are considerably larger than both the modern rural population density and the indigenous carrying capacity estimates made for Amazonia more widely, and they support previous interpretations that this culture practiced a form of low-density urbanism.

## Introduction

Scholars have long debated whether Amazonian environments were able to support large, complex societies prior to European Contact [1–4]. Traditionally, these

outputs, is available on GitHub ([https://github.com/JoeHirst-Reading/MoundSim\\_Population.git](https://github.com/JoeHirst-Reading/MoundSim_Population.git)).

**Funding:** This research was funded by the SCENARIO NERC doctoral training partnership grant (NE/S007261/1). The funders had no role in study design, data collection and analysis, decision to publish, or preparation of the manuscript.

**Competing interests:** The authors have declared that no competing interests exist.

environments were thought to restrict human occupation to small, semi-sedentary communities of <100 people [1,5,6], but multiple lines of evidence now challenge this perspective [7,8]. In particular, the documentation of numerous complex archaeological sites across the basin now suggests that much larger populations existed within certain localities [9–13]. One such locality is the *Llanos de Moxos* (LM), a vast (120,000 km<sup>2</sup>) seasonally flooded forest-savanna mosaic landscape in northern lowland Bolivia. Today, this region is sparsely populated at an average rural density of <1 person per km<sup>2</sup>, with most of its 520,000 inhabitants concentrated in the towns of Trinidad and Riberalta [14]. However, the LM also contains a variety of earthworks which provide evidence to suggest that its pre-Columbian population was much larger [15,16]. Perhaps most well-known are the earthworks found in the LM's southeastern sector, where the now-extinct Casarabe Culture constructed at least 189 earthen habitation mounds, interconnected by a dense network of causeways, canals, and lakes [17]. Reaching up to 20 ha in surface area and 20 m in height, the size and spatial complexity of these mound structures suggest that the Casarabe Culture engaged in a form of low-density agrarian urbanism [18]. Exploiting fertile sediments deposited in the southeastern LM during the late Holocene [19], palaeobotanical evidence shows that this culture utilised their causeway-canal system as a drainage and irrigation network to practice intensive maize monoculture in the open savannas [17,19–21]. Recent skeletal carbon isotope analyses indicate that this maize formed a central component of their diet [22].

The presence of these earthworks strongly suggests that the southeastern LM once supported a large, sedentary population. Many of the mounds are directly integrated within the causeway-canal network [18], indicating that they were contemporaneously occupied. Radiocarbon dates obtained from several of the mounds show that this culture continuously inhabited the southeastern LM for a whole millennium between 400 and 1400 CE [23–25]. This evidence implies that, despite reaching a sufficient population density to simultaneously occupy their network of earthworks, the Casarabe Culture was still able to support itself here in the long-term. Such a feat appears incompatible with the <1 person km<sup>2</sup> carrying capacity estimates proposed for Amazonia more widely [26–28]. If the population size of the Casarabe Culture was indeed large, it raises numerous questions about how they utilised the southeastern LM to support themselves, as opposed to the cattle ranching and mechanised rice agriculture strategies employed today [29–31].

To date, no systematic, rigorous attempt has been made to estimate the population size of the Casarabe Culture. The only published figure proposes that between 500 and 1000 people inhabited the medium-sized mound located close to Ibiato village (red box, Fig 1) [32]. However, while these figures align with the statements made in historical European texts, which claim that the LM once contained villages with as many as 2000 inhabitants [35,36], they are entirely speculative and contain no supporting evidence. Two unpublished estimates have also been made by co-author Lombardo [37], but these span multiple orders of magnitude, ranging between 3000 and 250,000 people for a 4500 km<sup>2</sup> area of the southeastern LM where the Casarabe Culture's earthworks have been mapped in detail [17]. Beyond these, the only

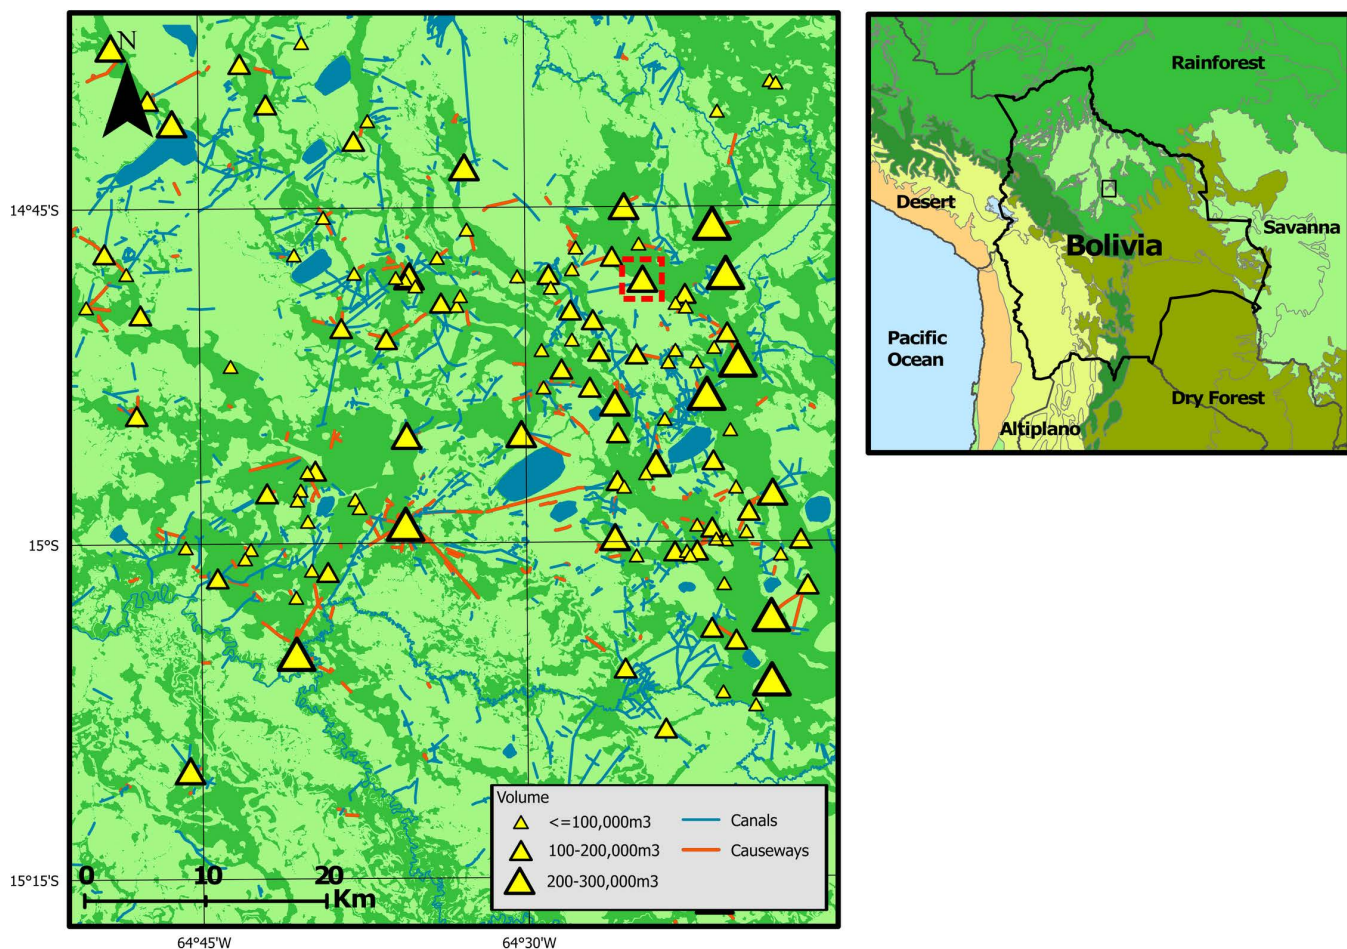

**Fig 1. Map displaying the earthworks of the southeastern LM, set against a land cover classification demarcating areas of tropical forest (green), savanna (light green), and water (blue).** Earthworks are a modified version of the dataset produced in Lombardo and Prümers [17]. The red box highlights the mound site for which population estimates have been proposed [32]. Inset map displays the location of the main map in relation to central South America, set against a map of terrestrial ecoregions [33], colour-coded into areas dominated by tropical forest (green); savanna (light green); yungas (dark green); tropical dry forest (gold); altiplano (yellow); and desert (orange). Modified from [34] under a CC BY license. Original copyright 2025.

<https://doi.org/10.1371/journal.pone.0325104.g001>

available estimates are applicable to either the wider LM or Amazonia more generally (Table 1), and these further extend the lower end of Lombardo's range down to just 750 people ( $0.15 \text{ people km}^{-2}$ ) [40]. Such large uncertainties highlight the difficulties in constraining population estimates with limited archaeological evidence.

Despite the significant challenges involved in calculating palaeopopulation estimates, two unique characteristics can help constrain these calculations for the Casarabe Culture. Firstly, the atypical dominance (in comparison with most of Amazonia) of forest-savanna mosaic vegetation in this landscape greatly restricts the availability of various forest resources, many of which are necessary for survival (e.g., fuelwood). Secondly, unlike many other contemporaneous pre-Columbian (pre-1492 CE) indigenous groups, the Casarabe Culture intentionally chose to construct and settle atop earthen mounds, elevated above the seasonal flood waters. This distinctive practice enables us to pinpoint where on the landscape the members of this culture were once concentrated. Both of these characteristics can be combined to further parameterise and inform any attempt to model the population size of this culture.

**Table 1. Previous population estimates applicable to the Casarabe Culture sourced from the wider literature. The 'Projected Population' variable applies population density estimates to our study area, highlighted in Fig 1 and discussed below.**

| Author                 | Region                                      | Method                   | Population Density Estimate      | Projected Population for our study area |
|------------------------|---------------------------------------------|--------------------------|----------------------------------|-----------------------------------------|
| Meggers [28]           | Amazonia                                    | Carrying Capacity        | 0.3 km <sup>-2</sup>             | 1506                                    |
| Meggers [27]           | Amazonia                                    | Carrying Capacity        | 0.2-1.0 km <sup>-2</sup>         | 1004 - 5020                             |
| Denevan [38]           | Llanos de Moxos                             | Habitat Density          | 2.0 km <sup>-2</sup>             | 10,040                                  |
| Métraux [39]           | Llanos de Moxos                             | Jesuit Count             | 30–100 settlement <sup>1</sup>   | 3570 - 11,900                           |
| Steward [40]           | Llanos de Moxos                             | Jesuit Count             | 0.15 km <sup>-2</sup>            | 753                                     |
| Steward and Faron [41] | Llanos de Moxos                             | Jesuit Count             | 0.23 km <sup>-2</sup>            | 1155                                    |
| Erickson [32]          | Southeastern LM                             | N/A                      | 500–1000 settlement <sup>1</sup> | 59,500 – 119,000                        |
| Lombardo [37]          | Region studied in Lombardo and Prümers [17] | Architectural Energetics | 0.61 km <sup>-2</sup>            | 3062                                    |
| Lombardo [37]          | Region studied in Lombardo and Prümers [17] | Carrying Capacity        | 50 km <sup>-2</sup>              | 251,100                                 |

<https://doi.org/10.1371/journal.pone.0325104.t001>

In this article, we provide the first range of systematically derived population estimates for the Casarabe Culture. We obtain these estimates by employing a multifaceted modelling approach which combines three distinct methodologies: architectural energetics, maximum carrying capacity, and agent-based modelling. Our objectives are: (i) to generate initial upper and lower population boundaries for the Casarabe Culture using the architectural energetics and carrying capacity methods; (ii) to further constrain this range by comparing these boundary estimates with the results generated by our agent-based model, which we developed to explore the growth of the Casarabe Culture over time; and (iii) to identify which of the assumptions made during our model experiments most accurately recreate the real landscape. This multifaceted approach reduces the influence of limitations and assumptions associated with the above methods [4], allowing us to generate population estimates for the Casarabe Culture across a range of scenarios. Some of these limitations are introduced in the methods section, and we explore the limitations of our own approach in greater detail in the 'Numbers from Nowhere' subsection of the discussion.

## Materials and methods

### Study area

The LM is a seasonally-flooded forest-savanna mosaic landscape situated on the southwestern periphery of Amazonia. Up to 80,000 km<sup>2</sup> of this landscape becomes inundated on a seasonal basis, predominantly from pluvial flooding [42,43]. This inhibits tree growth in low-lying areas, restricting the establishment of tropical forests to a dendritic network of palaeoriver levees extending across the landscape [44,45]. Taking advantage of this higher ground, the Casarabe Culture built a network of settlement mounds atop these levees. The mounds themselves consist of an elevated platform, normally circular or elliptical in shape, and usually topped by a pyramidal structure [17,18]. Archaeological excavations show these structures were built in stages from interwoven layers of clay and domestic refuse, and that their primary use was for habitation [46,47]. Large quantities of ceramics were incorporated into the refuse, which have subsequently been used to reconstruct a five-stage chronological sequence of occupation spanning from 400 to 1400 CE [23–25]. The mounds are directly integrated into the wider causeway-canal system, sometimes being encircled by canals and/or polygonal enclosures [17]. In general, the causeways and canals are constructed adjacent to one another [36], with the former being comprised of canal fill, and the latter typically reaching 1 m in depth [19]. Aside from interlinking the settlement mounds, the canals are connected to nearby rivers and lakes, and have been proposed to serve multiple functions that include drainage, irrigation, and providing water to the mound settlements [17,20,48].



The population estimates generated within this study explicitly apply to the 5020 km<sup>2</sup> quadrant of the southeastern LM displayed in Fig 1. This quadrant fully encompasses the earthworks which have been mapped in the greatest detail [17], though note that the area previously occupied by the Casarabe Culture extends beyond these boundaries [18,36].

## Palaeopopulation models

The first stage of our multifaceted modelling approach is to generate minimum and maximum population boundary estimates for the Casarabe Culture. To calculate the minimum population estimate, we employ an architectural energetics approach. The labour resources required to construct the mounds, causeways, and canals still visible in the southeastern LM today [17] must have been directly extracted from members of the Casarabe Culture. Architectural energetics aims to quantify the effort involved in such a task [49,50], providing insight into both the size of the minimum requisite workforce and the population needed to sustain it. An important limitation of this method is its reliance on the estimated labour costs of construction activities, many of which vary between sites [49]. Nevertheless, while a complete range of site-specific cost estimates for the Casarabe Culture is unavailable, filling these gaps with suitable costs from the wider literature should suffice to produce an order-of-magnitude estimate of the regional population. Architectural energetics estimates calculated for the Casarabe Culture should be interpreted as a minimum population estimate because: (i) some earthworks are no longer visible, and (ii) building these structures represents additional labour on top of normal subsistence activities (e.g., cultivation).

We obtain our maximum population estimates using a maximum carrying capacity approach [51]; whereby we quantify the largest number of people that our study area could support through maize cultivation and fuelwood extraction. There are a number of limitations associated with such an approach, including the possibility of capacity growing over time through cultural and technological innovation [52], as well as the importance of choosing appropriate limiting factors [53]. We selected maize and fuelwood because maize is ubiquitously present across Casarabe Culture sites [20,47,54] and constitutes a dominant component of their diet [22], while fuelwood is relatively scarce on the landscape because it can only be extracted from the limited areas of forested land, spatially constrained by *terra firme* (non-flooded) micro-topography on palaeoriver levées.

We further constrain these initial boundaries based on the outputs of our agent-based model, *MoundSim Population*. Agent-based models are characterised by their focus on the emergent behaviour of individual ‘agents’, resulting from their interactions with one another and their surrounding environment. In our model, these agents represent household units—comprising adults and children—that collectively form a representation of the Casarabe Culture within a gridded virtual landscape. Programmed to subsist (through maize-based agriculture), reproduce, and redistribute themselves across this virtual landscape, our household agents enable *MoundSim Population* to function like a ‘virtual laboratory’. The outputs of our model allow us to explore how the culture could have developed under a range of assumptions [55,56]. In doing so, we also determine which parameter assumptions most closely recreate the number and spatial distribution of settlement mounds on the real landscape.

## Architectural energetics

To produce energetics-based population estimates for the Casarabe Culture, we first revised previous estimates for the amount of earth required to build their earthworks [17] to account for: (i) new volumetric data obtained from recent LiDAR scans [18]; (ii) additional earthworks identified subsequent to previous mapping [17]; (iii) the infilling of canals and borrow pits; and (iv) earth lost from the settlement mounds due to erosion. Following previous work [17], we estimate the volume of each mound by using a surface area: volume ratio based on the sites with either existing LiDAR data or a high-resolution digital elevation model (DEM). For the causeway-canal network, we assumed that 5 m<sup>3</sup> of earth was excavated to produce one linear metre of each earthwork [17]. The labour effort required to move this earth was assumed to be expended linearly over time, with the Casarabe Culture moving 1/1000<sup>th</sup> of the total volume annually. We assume that the earth eroded from these structures represented a consistent proportion of the total earth comprising them.

To estimate the rate at which earth could be excavated, we utilised an experiment conducted in the LM [57] in which workers were asked to create pond features. The workers were not asked to transport the earth and were paid daily (in 8-hour workdays), according to the quantity of material excavated. These experiments showed that workers were able to excavate between 1.7 and 4.7 m<sup>3</sup> of earth daily, rates that are well within the range for other experiments conducted on dense soils [49]. However, workers were allowed to complete this task using metal tools. Even stone tools were a scarce commodity for the Casarabe Culture [47], as the total absence of rock outcrops in the southeastern LM meant that any such tool needed to be obtained via long-distance trade. We therefore apply the 1:2.7 ratio of Erasmus [58] to account for the decrease in efficiency from metal tools to digging sticks, reducing the expected excavation efficiency to between 0.3 and 1.4 m<sup>3</sup> person<sup>-1</sup> day<sup>-1</sup>. To be comprehensive, we present energetics estimates across the entire range of these assumed values.

Any earth excavated for the causeway-canal network is assumed to have been transported only a short distance (5 m), as these features were constructed adjacent to one another [36]. For the mounds, we assume the earth was obtained from pits/canals adjacent to the feature, before being transported upslope and deposited on the main mound platform. These pits were then intentionally infilled as the mound grew. To calculate the earth transportation rate, we employed a modified version of the formula developed by the United Nations [59,60], which expresses transport rate ( $E_t$ , m<sup>3</sup> day<sup>-1</sup>) in relation to the transported load ( $Q$ , kg); distance travelled ( $L$ , km); time spent working ( $H$ , hours day<sup>-1</sup>); and speed of travel ( $V$ , km hr<sup>-1</sup>). Prior to calculation, we convert  $Q$  into an estimate for the volume of earth transported, dividing it by the average density of clay-dominated soil (1500 kg m<sup>-3</sup>;  $\rho$ ).  $L$  and  $V$  are divided into portions to account for the effort involved in constructing the mounds ( $L_m$ ,  $V_m$ ) and causeway-canal network ( $L_c$ ,  $V_c$ ), as well as to account for the effort involved in transporting earth over flat ground ( $f$ ), upslope ( $s$ ), and on the return trip without transporting earth ( $'$ ):

$$E_t = \left[ \frac{Q}{\rho} * \frac{1}{\left( \frac{L_{mf}}{V_{mf}} + \frac{L_{m'}}{V_{m'}} + \frac{L_{ms}}{V_{ms}} \right)} * H \right] + \left[ \frac{Q}{\rho} * \frac{1}{\left( \frac{L_c}{V_c} + \frac{L_c'}{V_c'} \right)} * H \right] \quad (1)$$

We assumed that workers travelled at an unloaded walking speed of 5 km hour<sup>-1</sup>, and that each expended a constant amount of energy irrespective of external conditions. As such, changes to these conditions (e.g., load carried, slope) are expected to influence travel speed. To quantify these changes, we employed the formula of Pandolf and colleagues [61,62], which calculates the metabolic rate of humans relative to body mass ( $M$ , kg),  $Q$  and  $V$  as described above, the slope gradient (%),  $G$ , and a terrain modifier representing the difficulty of traversing an environment ( $\mu$ ) [63].

$$\text{Metabolic Rate} = 1.5M + 2(M + Q) \left( \frac{Q}{M} \right)^2 + \mu(M + Q)(1.5V^2 + 0.35VG) \quad (2)$$

To calculate the size of the required workforce, we converted the volume of earth needed to build the mounds ( $T_m$ ) and the causeway-canal network ( $T_c$ , m<sup>3</sup>) into estimates of earth moved per year ( $T_{md}$ ,  $T_{cd}$ ). This was done by dividing total estimates by the assumed number of days worked per year ( $D$ ; 18) and the duration of mound occupation ( $Y$ , years):

$$T_{md} = \frac{T_m}{(D * Y)} \quad (3)$$

$$T_{cd} = \frac{T_c}{(D * Y)} \quad (4)$$

Finally, workforce size ( $P_w$ ) is derived by dividing the total amount of earth needed to be moved daily by the excavation and transportation rates for both the mounds ( $E_{mx}$ ,  $E_{mt}$ ) and the causeway-canal network ( $E_{cx}$ ,  $E_{ct}$ ):

$$P_w = \left[ \left( \frac{T_{md}}{E_{mx}} \right) + \left( \frac{T_{md}}{E_{mt}} \right) \right] + \left[ \left( \frac{T_{cd}}{E_{cx}} \right) + \left( \frac{T_{cd}}{E_{ct}} \right) \right] \quad (5)$$

This result is converted to a total population estimate by assuming it constitutes between 20 and 50% of the population, following estimates made at other sites [64]. At lower ratios, this proportion assumes certain people were unable to participate (e.g., for being elderly or too young). Meanwhile, higher ratios assume that only adult males took part in earthwork construction. A full set of calculations for our estimates can be found in the supplementary information (S1 File).

## Carrying capacity

Our carrying capacity estimates are based on the *per capita* quantity of land required by the Casarabe Culture for maize cultivation and fuelwood extraction. While this culture is known to have utilised the open savannas, it remains unclear whether they also practiced cultivation in the forests similar to modern indigenous groups [13,17,20]. For this reason, we calculated the carrying capacity for maize and fuelwood under three different scenarios: (i) cultivation solely occurred in the open savannas; (ii) maize was grown in both the savannas and the forests; and for comparison, (iii) cultivation was restricted solely to forested areas. Although the Casarabe Culture may have employed these forests for other types of resource production (e.g., agroforestry), for simplicity, our carrying capacity model assumes any forested land used for cultivation was clear-cut and maize monoculture planted. Two sets of population estimates were produced for each of the above scenarios, one assuming all the resources on the landscape could be exploited, the other restricting accessible resources to those within daily walking distance of the settlement mounds, defined as 7 km based on the walking distances recorded for modern Amazonian indigenous groups [65]. Our estimates below assume that the Casarabe Culture cultivated maize as part of a swidden-fallow system. Please note that this assumption is made for the sake of simplicity, as little information exists about the Casarabe Culture's farming practices, especially within the forests.

First, we calculate the *per capita* land requirement for maize cultivation ( $L_{PM}$ ) following the formula developed by Fearnside [53,66]. To use this formula, we make assumptions regarding the quantity of maize consumed by an individual per harvest cycle ( $Cons_P$ ), the yield of maize per hectare ( $L_R$ ), and the 'Cultivation Factor' ( $C$ ), a value that varies depending upon the length of both the fallow period ( $Fal_{yr}$ ) and the crop cycle ( $Crop_{yr}$ ):

$$L_{PM} = Cons_P * C / L_R$$

where:

$$C = (Fal_{yr} / Crop_{yr}) + 1 \quad (6)$$

We also calculate a *per capita* land requirement for fuelwood extraction ( $L_{PF}$ ), using a similar formula that omits  $C$  by assuming a one-year 'cultivation period' and no fallow time. To convert this into carrying capacity ( $k$ ), we estimated the quantity of forest and savanna available to the Casarabe Culture based upon a land cover dataset that we produced when developing our agent-based model. The quantity of each land cover type was estimated using the 'Calculate Geometry' tool in ArcGIS 2.7.0. To produce  $k$ , the amount of available land ( $L_T$ ) was divided by the land required per person:

$$k = \frac{L_T}{(L_{PM} + L_{PF})} \quad (7)$$

*Per capita* maize consumption was estimated based upon the calorific requirements proposed by the WHO for adults aged 18–30 [67]. Following the strong likelihood that maize was their staple crop [20,21,54,68,69], we assume it supplied two thirds of their dietary requirement [22,70], deriving a demand of 178.1 kg person<sup>-1</sup> yr<sup>-1</sup> [71,72]. We also derive a fuelwood demand of 700 kg person<sup>-1</sup> yr<sup>-1</sup> based upon the consumption of the Tsimane Indigenous group [73], which falls within the expected demands for other groups in the tropics [74]. As no reliable estimates are available for the *per hectare* productivity of maize in the savannas of the LM, we calculated carrying capacity using a range of different maize productivity estimates (300–1800 kg ha<sup>-1</sup>). Information on the parameter values selected for the *per hectare* productivity of fuelwood can be found within the

supplementary information (S2 File). Under the scenario where maize is solely cultivated in the open savannas, the minimum  $k$  produced between these two resources is selected. Where maize is cultivated in forested areas, the land is optimally distributed according to *per capita* resource requirements. If maize can be cultivated in both, we assume that the Casarabe Culture preferentially cultivated maize in the savannas before encroaching into the forest. A full range of assumptions and calculations for our carrying capacity estimates can be found within the supplementary information (S3 File).

### Agent-based modelling: moundsim population

Our agent-based model, *MoundSim Population*, builds upon a previous model that we created to explore the environmental impacts of the Casarabe Culture (*MoundSim LandUse*), which will be published separately. A full ODD + D (Overview, Design Concepts, Details and Decision-making) description of *MoundSim Population*, including these base mechanics, is provided within the supplementary information (S4 File) [75,76]. Here, we explicitly focus on the aspects of *MoundSim Population* that differ between the two models. *MoundSim Population* has been developed and implemented in NetLogo Version 6.3.0 [77]. The full model code will also be made available on GitHub ([https://github.com/JoeHirst-Reading/MoundSim\\_Population.git](https://github.com/JoeHirst-Reading/MoundSim_Population.git)).

Similar to our prior model, *MoundSim Population* produces a virtual representation of our study area, comprised of a 657x764 grid of hectare-sized land patches. The model landscape is inhabited by agents, which collectively form an artificial recreation of the Casarabe Culture. Human behaviour is implemented as a set of simple, logical rules guided by the principles of bounded rationality [78,79], which are executed by these agents. As our knowledge of the Casarabe Culture is limited, we inform and parameterise these behavioural rules using ethnographic data sourced from modern indigenous groups [73,80]. The primary agents of interest are intended to represent household units of adults and children, each requiring a sufficient quantity of five different resources to survive: Maize; Foraged Tree Crops; Fuelwood; Palm Leaves; and Animal Protein. Their encoded behaviour enables them to obtain these resources by claiming and modifying land patches on the model landscape. Each household is assumed to reside atop a mound settlement, implemented within the model as a second agent-type to which the households are linked. Each timestep equates to a year, with the model being run for 1000 timesteps to match the known 1000-year occupation period of the mounds [23–25].

Upon initialising the model, 10 settlement agents spawn at suitable locations on the model landscape, each with an attached number of households. The number of agents at startup is intended to reflect the population density at which hunter-gatherers become less mobile [81] because our model assumes the Casarabe Culture developed through demographic expansion. *MoundSim Population* allows both the total population and the number of adults/children within each household to grow and change during a simulation. Every household possesses two variables to track the number of adults/children inhabiting it, with each individual represented as a number reflecting their year of birth. Over time, these individuals age, can start households of their own, produce children, and die.

During each timestep, new households are created as children age, and start families with other eligible individuals from the same settlement. In our experiments below, a child is considered eligible once they reach 16 years of age [73,81]. Households that contain two adult inhabitants can produce new children, with the chance dependent on a user-defined value, controlled by a slider on the model interface ( $b_h$ ):

$$Prob(Success) = u(0, 1.00) \leq b_h \quad (8)$$

Any new child is added to the children list variable of the household that spawned it. Households can only produce a child if the younger adult, assumed to be female for simplicity, is less than 50 years old [82]. Age-related mortality is handled at the individual level, with the chance of death being age-specific ( $Mo$ ), based upon data collected from 18 Tsimane villages [83]. For simplicity, all individuals aged 80 and older are assumed to die:

$$Prob(Death) = u(0, 1.00) \leq Mo \quad (9)$$



Another defining feature of *MoundSim Population* is that households can move between existing settlements, as well as start new settlements of their own. In each timestep, there is a chance for an active settlement (defined as possessing at least one member household) to experience a migration event depending on a user-defined value ( $Mi_u$ ):

$$Prob(Success) = u(0, 1.00) \leq \min \left( Mi_u * \left( \frac{P_{st}}{cap_t} \right), (2 * Mi_u) \right) \quad (10)$$

This chance is modified based upon the population of the home settlement ( $P_{st}$ ) relative to its current capacity ( $cap_t$ ), which increases over time as the mound is assumed to be constructed. While it is possible for the settlement's population to exceed this capacity, doing so further increases the chance of a migration event occurring. Migration events are only possible if the settlement population exceeds half of its current capacity, and must involve at least five households to occur.

A migrating household group can choose either to join an existing settlement or to start their own. They can only join an existing settlement with spare capacity, and can only start a new one if there are fewer than a user-defined number of active settlements within the distance they are willing to travel. Should they fail to meet one of these criteria, they may change their strategy. If neither requirements are met, the event itself will fail. If a migrating group seeks to join an existing settlement, they will calculate a habitability score ( $H_{sc}$ ) for all eligible candidate settlements within the range they are willing to migrate. If starting their own settlement, they will instead calculate a suitability score ( $S_{sc}$ ) for a subset of available land patches. The optimal location is selected based on the following calculation:

$$H_{sc} = Pd_{sc} - Cr_{sc} + Pop_{sc} - D_{sc} + Di_{sc} \quad (11)$$

$$S_{sc} = Pd_{sc} - D_{sc} + Di_{sc} \quad (12)$$

Both scores are comprised of multiple distinct components, each of which can be user-weighted to determine their relative contribution to overall utility. The first component,  $Pd_{sc}$ , reflects the location's productivity. Locations are considered more productive if they lie atop the fertile sediments deposited in the southeastern LM during the late Holocene [19]:

$$Pd_{sc} = Pd_w * (100 * Pd) \quad (13)$$

The second and third components ( $D_{sc}$ ,  $Di_{sc}$ ) are distance related, changing utility scores relative to their distance from the migrating group's home settlement:

$$D_{sc} = D_w * 100 * \frac{D^2}{R_m^2} \quad (14)$$

$$Di_{sc} = Di_w * 100 * \frac{D^2}{R_m^2} \quad (15)$$

The final components ( $Pop_{sc}$ ,  $Cr_{sc}$ ) either increase or decrease utility based upon the population of the candidate settlement relative to its current capacity:

$$Pop_{sc} = Pop_w * 100 * \frac{P_{st}^2}{cap_{ct}^2} \quad (16)$$

$$Cr_{sc} = Cr_w * 100 * \frac{P_{st}^2}{cap_{ct}^2} \quad (17)$$

Once a suitable site has been chosen, the migrating group will abandon their existing territory, leave their parent settlement, and attach themselves to the new one.

## Model experiments

We conducted experiments on *MoundSim Population* to explore the growth and maximum size of agent populations under a range of assumptions. To thoroughly explore our model's parameter space, we employed a Latin hypercube sampling framework to identify 40 optimally spaced parameter combinations (Table 2) [84,85]. Each of these combinations was tested against agents that were programmed to prefer cultivating in elevated areas, but were also dissuaded from claiming land harder to clear of vegetation. 50 simulation runs of 1000 years were performed for each configuration to account for any potential variability in the resulting agent populations (total: 2000 runs).

A parameter combination was considered 'successful' and thus warranted further investigation if, across the 50 simulation runs, it produced an average number of settlements similar to those in the real landscape during at least one time-step. We defined this number to be within 20% of the 119 mounds identified within our study area (95–143 settlements) [17]. Crucially, settlement agents did not need to be active at the end of a simulation run for the configuration to be considered successful.

To investigate which 'successful' parameter combination most accurately recreated reality, we compared the spatial configuration of generated settlement agents to mounds on the real landscape. We produced a distance metric incorporating a variety of spatial statistics, such as the mean and standard deviation of the distance between settlements, to aid in this comparison. The full range of statistics considered within this metric are described within Fig 2.

## Results

### Architectural energetics

Our minimum population estimates for the Casarabe Culture, as generated by the architectural energetics approach, indicate that an average workforce of between 4500 and 12,000 people was needed to construct the earthworks of the southeastern LM (Table 3). The majority of these estimates fall between 5000 and 8000 people, only exceeding this under the assumption of very low excavation rates ( $<0.5 \text{ m}^3 \text{ day}^{-1}$ ). These estimates account for all the mounds, causeways, and canals currently mapped within our study area, revising upwards of the previous 20,000,000  $\text{m}^3$  earth estimated to be necessary for their construction [17] to 49,250,000  $\text{m}^3$ . Approximately three quarters of this value (36,000,000  $\text{m}^3$ ) is attributed to mound construction, but the largest increase was associated with the causeway-canal network, which more than doubled to account for infilling and the identification of new earthworks. As the volumetric estimates are based on the mounds for which DEM/LiDAR data is available, they also incorporate any structures which form part of the main mound platform (e.g., pyramidal structures). However, while this also includes other identified structures (e.g., polygonal enclosures [17]), note that (i) their presence varies between mounds and (ii) our study area may still contain as-yet unidentified earthworks. For this reason, and given the incomplete mapping of the causeway-canal network (Fig 1), these estimates should be treated as conservative (Tables 3 and 4).

Assuming a workforce: population ratio of between 1:2 and 1:5, our calculations indicate the Casarabe Culture reached a minimum population of between 9000 and 60,000 people within our 5020  $\text{km}^2$  study area. Most of our results vary between 10,000 and 30,000 people, the latter threshold only being exceeded if excavation rates are low ( $<0.7 \text{ m}^3 \text{ day}^{-1}$ ) and if we assume that there are 4–5 dependents per worker. Assuming that the mounds are simultaneously active, this would equate to an average settlement population of between 120 and 200 people. Due to the numerous assumptions made within our energetics approach, these results should not be interpreted as precise; rather they should be viewed as order-of-magnitude approximations for the population size of the Casarabe Culture. Additionally, while these calculations assume a constant amount of earth was excavated and transported during each workday, the Casarabe Culture almost

**Table 2. Parameter combinations used in MoundSim Population Experiments. The full range of parameter combinations for each configuration can be found within the supplementary information (S6 File).**

| Continuous Variables      | Minimum            | Maximum |
|---------------------------|--------------------|---------|
| max-set-density           | 1.37               | 17.96   |
| mig-dist-cost             | 0                  | 1       |
| mig-lobe-bonus            | 0                  | 1       |
| mig-pop-bonus             | 0                  | 1       |
| mig-pop-cost              | 0                  | 1       |
| mig-dist-bonus            | 0                  | 1       |
| migration-distance        | 11.38              | 196.65  |
| migration-rate            | 0.01               | 0.20    |
| new-settlement-prob       | 0.11               | 0.89    |
| prob-household-birth      | 0.12               | 0.30    |
| protein-modifier          | 0.06               | 0.40    |
| settlement-base-capacity  | 23.22              | 492.56  |
| start-population-modifier | 0.50               | 1.50    |
| yr-10%                    | 13.52              | 197.04  |
| Boolean Variables         | Case 1             | Case 2  |
| forage-die                | TRUE               | FALSE   |
| forest-restrict           | TRUE               | FALSE   |
| fuelwood-die              | TRUE               | FALSE   |
| intentional-agroforestry  | TRUE               | FALSE   |
| lobe-restrict             | TRUE               | FALSE   |
| maize-die                 | TRUE               | FALSE   |
| palm-die                  | TRUE               | FALSE   |
| protein-die               | TRUE               | FALSE   |
| Case Switch Variables     | Options            |         |
| land-for-cultivation      | Forest Only        |         |
|                           | Savanna Only       |         |
|                           | Forest and Savanna |         |

<https://doi.org/10.1371/journal.pone.0325104.t002>

certainly grew in size over time. As such, the estimates quoted in Table 3 should be treated as conservative relative to the peak population actually reached.

### Maximum carrying capacity

Out of our initial 5020 km<sup>2</sup> study area, approximately 2.65% (133 km<sup>2</sup>) is classified as water unsuitable for either fuelwood extraction or maize cultivation, and has thus been excluded from our carrying capacity estimates. From the remaining terrestrial land (4887 km<sup>2</sup>), approximately 39.9% (1950 km<sup>2</sup>) is classified as forest and 75.6% (3694 km<sup>2</sup>) is located within daily walking distance (7 km) of one of the Casarabe Culture's settlement mounds. In this restricted range, the percentage cover of forest reduced to 35.2% (1300 km<sup>2</sup>). Our maximum carrying capacity estimates assume that all of the land suitable for each of these activities was fully utilised, factoring in the required fallow period for maize cultivation. These estimates suggest that the southeastern LM could have sustainably supported between 60,000 and 350,000 people (Table 5). While these figures decrease to between 41,000 and 225,000 if the available resources were restricted to those within daily walking distance of a settlement mound, they still imply that the Casarabe Culture was capable of sustaining a large sedentary population on the basis of potential maize and fuelwood supplies.

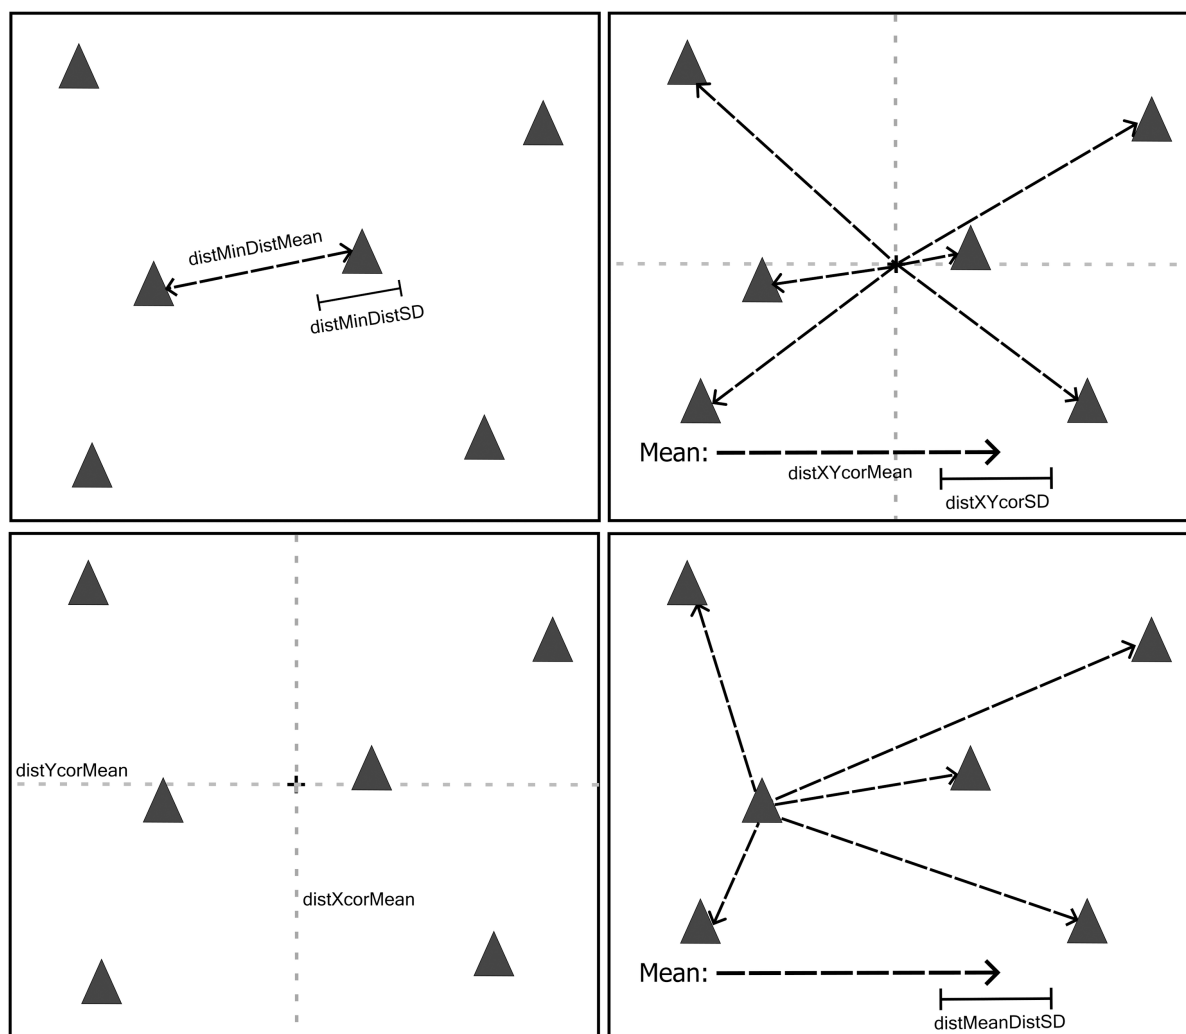

| Statistic       | Description                                                                                                                             |
|-----------------|-----------------------------------------------------------------------------------------------------------------------------------------|
| distMinDistMean | Mean distance between a settlement and its nearest neighbour                                                                            |
| distMinDistSD   | Standard deviation of the mean distance between a settlement and its nearest neighbour                                                  |
| distXcorMean    | Mean X (east-west) coordinate of settlements on the landscape                                                                           |
| distYcorMean    | Mean Y (north-south) coordinate of settlements on the landscape                                                                         |
| distXYcorMean   | Mean distance between an individual settlement and the mean xy coordinate of all settlements on the landscape                           |
| distXYcorSD     | Standard deviation of the mean distance between an individual settlement and the mean xy coordinate of all settlements on the landscape |
| distMeanDistSD  | Standard deviation of the mean distance between an individual settlement and all other settlements on the landscape                     |

**Fig 2. Graphic displaying the spatial components incorporated into our distance metric.** These metrics include: the mean and standard deviation of the distance between a settlement and its nearest neighbour; the mean x (east-west) and y (north-south) position of settlements, the standard deviation of the mean distance between settlement agents and the mean xy position of mounds; and the standard deviation of the mean distance between a mound and all other mounds on the landscape.

<https://doi.org/10.1371/journal.pone.0325104.g002>



**Table 3. Architectural Energetics calculations to estimate the size of the labour force and population of the Casarabe Culture. This includes the number of people needed to excavate and transport the earth needed to build each feature type, as well as total labour force and population estimates.**

| Excavation Rate (m <sup>3</sup> day <sup>-1</sup> ) | Total Canal/Causeway Excavators | Total Mound Excavators | Total Canal/Causeway Transporters | Total Mound Transporters | Total Labour Force | Workforce: Population Ratio: |        |        |        |
|-----------------------------------------------------|---------------------------------|------------------------|-----------------------------------|--------------------------|--------------------|------------------------------|--------|--------|--------|
|                                                     |                                 |                        |                                   |                          |                    | 1:2                          | 1:3    | 1:4    | 1:5    |
| 1.4                                                 | 521                             | 1,460                  | 22                                | 2,783                    | 4,786              | 9,571                        | 14,357 | 19,143 | 23,929 |
| 1.3                                                 | 561                             | 1,572                  | 22                                | 2,783                    | 4,938              | 9,876                        | 14,814 | 19,752 | 24,690 |
| 1.2                                                 | 608                             | 1,703                  | 22                                | 2,783                    | 5,116              | 10,232                       | 15,348 | 20,463 | 25,579 |
| 1.1                                                 | 663                             | 1,858                  | 22                                | 2,783                    | 5,326              | 10,652                       | 15,978 | 21,304 | 26,630 |
| 1.0                                                 | 729                             | 2,044                  | 22                                | 2,783                    | 5,578              | 11,156                       | 16,734 | 22,312 | 27,890 |
| 0.9                                                 | 810                             | 2,271                  | 22                                | 2,783                    | 5,886              | 11,772                       | 17,658 | 23,545 | 29,431 |
| 0.8                                                 | 912                             | 2,555                  | 22                                | 2,783                    | 6,271              | 12,543                       | 18,814 | 25,085 | 31,357 |
| 0.7                                                 | 1,042                           | 2,920                  | 22                                | 2,783                    | 6,767              | 13,533                       | 20,300 | 27,066 | 33,833 |
| 0.6                                                 | 1,215                           | 3,406                  | 22                                | 2,783                    | 7,427              | 14,854                       | 22,280 | 29,707 | 37,134 |
| 0.5                                                 | 1,458                           | 4,088                  | 22                                | 2,783                    | 8,351              | 16,702                       | 25,053 | 33,405 | 41,756 |
| 0.4                                                 | 1,823                           | 5,110                  | 22                                | 2,783                    | 9,738              | 19,475                       | 29,213 | 38,951 | 48,688 |
| 0.3                                                 | 2,431                           | 6,813                  | 22                                | 2,783                    | 12,049             | 24,097                       | 36,146 | 48,194 | 60,243 |

<https://doi.org/10.1371/journal.pone.0325104.t003>

**Table 4. Architectural Energetics calculations to estimate the number of person days needed to construct the earthworks of the southeastern LM.**

| Total Person-days |                  | Value       | Metric      |
|-------------------|------------------|-------------|-------------|
| Minimum           | Excavation       | 36,548,467  | person-days |
| Maximum           | Excavation       | 154,025,682 | person-days |
|                   | Transport        | 50,489,047  | person-days |
| Minimum           | Canals/Causeways | 10,013,452  | person-days |
|                   | Mounds           | 77,024,062  | person-days |
|                   | Total:           | 87,037,514  | person-days |
| Maximum           | Canals/Causeways | 40,905,636  | person-days |
|                   | Mounds           | 163,609,093 | person-days |
|                   | Total:           | 204,514,729 | person-days |

<https://doi.org/10.1371/journal.pone.0325104.t004>

The extent to which each of these resources constrained the Casarabe Culture's population size depends upon the assumed productivity of maize. Using a cultivation model with a 3-year cultivation period and 10-year fallow period, similar to modern indigenous groups [65,86], each individual member of the Casarabe Culture would have required between 0.43 and 2.57 hectares of land for maize cultivation and 0.58 hectares of forested land for fuelwood production. Given that the land required *per capita* to produce fuelwood is normally smaller, it only becomes the primary resource limiting population size under specific conditions. These conditions include scenarios where maize productivity is high (>900 kg ha<sup>-1</sup>) or if members of the Casarabe Culture were forced to cultivate maize solely in forested areas, forcing them to choose which resource to produce.

Our results emphasise the substantial benefits of cultivating in the open savannas; 50% reductions in carrying capacity are recorded when maize is grown solely in forested areas. This reduction is driven by the mutually exclusive practices of maize monoculture and fuelwood extraction from the same parts of the landscape. By contrast, strategies that exploit the open savanna are able to support far greater populations because maize can be cultivated in areas where fuelwood extraction is impossible. Mixed cultivation strategies are particularly effective, as they provide further flexibility if the

**Table 5. Maximum carrying capacity population estimates for the Casarabe Culture based upon maize production and the sustainable extraction of fuelwood. Estimates are provided in number of people. Upper table calculates estimates for all resources within our study region. Lower table calculates estimates for all land within daily walking distance (7 km) from all mounds on the landscape.**

| Carrying Capacity assuming all resources can be exploited                                   |                          |                           |                         |
|---------------------------------------------------------------------------------------------|--------------------------|---------------------------|-------------------------|
| Maize Productivity (kg/ha)                                                                  | Forest Maize Cultivation | Savanna Maize Cultivation | Mixed Maize Cultivation |
| 300                                                                                         | 61,734                   | 114,214                   | 154,839                 |
| 600                                                                                         | 104,209                  | 228,428                   | 261,371                 |
| 900                                                                                         | 135,220                  | 334,019                   | 334,019                 |
| 1200                                                                                        | 158,857                  | 334,019                   | 334,019                 |
| 1500                                                                                        | 177,470                  | 334,019                   | 334,019                 |
| 1800                                                                                        | 192,508                  | 334,019                   | 334,019                 |
| <b>Total Area</b>                                                                           | 4887                     | km <sup>2</sup>           |                         |
| <b>Forest</b>                                                                               | 39.87                    | %                         |                         |
| Carrying Capacity assuming resources are restricted to within daily walking distance (7 km) |                          |                           |                         |
| Maize Productivity (kg/ha)                                                                  | Forest Maize Cultivation | Savanna Maize Cultivation | Mixed Maize Cultivation |
| 300                                                                                         | 41,163                   | 93,081                    | 117,040                 |
| 600                                                                                         | 69,484                   | 186,161                   | 197,566                 |
| 900                                                                                         | 90,161                   | 222,717                   | 222,717                 |
| 1200                                                                                        | 105,922                  | 222,717                   | 222,717                 |
| 1500                                                                                        | 118,333                  | 222,717                   | 222,717                 |
| 1800                                                                                        | 128,360                  | 222,717                   | 222,717                 |
| <b>Accessible Area</b>                                                                      | 3694                     | km <sup>2</sup>           |                         |
| <b>Forest %</b>                                                                             | 35.17                    | %                         |                         |

<https://doi.org/10.1371/journal.pone.0325104.t005>

system is maize-limited. At maize productivity levels of 300 and 600 kg ha<sup>-1</sup>, approximately 66 and 33.3% of forested areas respectively remain unused if only the savannas are used to cultivate maize (41.6 and 83.1% respectively when cultivation is restricted to within walking distance). By encroaching into forested areas, mixed strategies are able to increase the population capacity by up to 35.6% for the entire landscape, and 25.7% within walking distance of the mound settlements. When maize productivity exceeds 900 kg ha<sup>-1</sup>, no difference is observed between savanna and mixed strategies because population becomes fuelwood-limited.

It should be noted that these carrying capacity estimates reflect a theoretical maximum population that can indefinitely be sustained. As such, it is possible that the Casarabe Culture could also have temporarily exceeded the capacities quoted in [Table 5](#).

## MoundSim population

The 40 parameter combinations generated by our Latin hypercube sampling framework produced a wide range of maximum population estimates. The lowest value (configuration 21) reached just 1000 people, far below the minimum work-force size produced by our energetics estimates. By contrast, four combinations (configurations. 13, 20, 32, and 39) could not be completed because their households faced so few demographic restrictions that their population rapidly exceeded 500,000. Of the combinations that could be completed, the largest (configuration 7) produced an estimate of 270,000, reflecting a hundredfold increase compared with the starting population. The majority of combinations produce populations ranging between 5000 and 100,000 people, depending upon which resources are limited ([Fig 3A](#); also see S7 File). The most restrictive resource was animal protein, which rarely allowed populations to exceed 10,000 even though households never relied on it for more than 40% of dietary requirements. By contrast, simulations restricted solely by foraged tree crops regularly exceeded populations of 100,000.

Irrespective of the restricting resource(s), every parameter combination exhibited a similar pattern of population growth, characterised by expansion for the first few hundred timesteps, before transitioning to follow a logistic growth pattern. This sometimes culminated in the establishment of a population equilibrium, but the time taken to reach it varied substantially. In many cases (e.g., configuration 7), the population began to stabilise within centuries. However, others still continued to exhibit consistent growth even after 1000 timesteps (e.g., configuration 19). Some ensemble members would even overshoot, reaching a population peak, before subsequently exhibiting signs of decline. These patterns are driven by multiple interrelated processes that increase pressure on the finite resources available within localised parts of the model landscape. Even when populations were undergoing exponential growth, small numbers of deaths were still recorded due to localised resource shortages (see S7 File). These are further exacerbated under low migration rates (e.g., configuration 18), as households were unable to escape from the highly stressed localities possessing high populations and low resource availability.

Of the 36 parameter combinations that could be simulated, only 10 were able to produce a similar number of mound settlements as compared with the real landscape (Fig 3B). No single factor was consistently found to prevent a combination from achieving this goal. Certain constraints were common among the successful combinations, such as all possessing fertility rates exceeding 0.15, almost all (9/10) being fatally restricted by palm leaf resources, most (7/10) being restricted by fuelwood, and agents never preferring to start new settlements close to their former home. However, these constraints were insufficient to guarantee success, with configuration 6 failing despite possessing all of them. Furthermore, many 'failed' combinations still produced a substantial number of settlements, with 13 combinations generating between 50 and 80 settlement sites. However, it remains unclear whether these combinations could eventually reach the threshold, even with substantial additional time, due to the logistic patterns of population growth observed in Fig 3.

Successful parameter combinations were observed to produce a wide variety of population estimates, ranging between 3000 and 200,000 people when the number of settlement agents matched the number of mounds on the real landscape (Fig 4). The majority reached populations of between 8000 and 20,000, with only configurations 11, 17, and 4 falling outside this range. Configuration 4 produced populations far larger than any other successful combination, a pattern driven by few resource restrictions (agents were only constrained by maize and palm leaf supplies), low migration rates, and a relative intolerance towards establishing new settlements. Contrastingly, configurations 11 and 17 were heavily resource restricted, such that they could only reach populations of between 3000 and 4000 people.

Multiple different strategies enabled households to produce a similar number of settlement agents compared with mounds on the real landscape. Under low agent populations (e.g., configurations 11, 17), the number of households was often insufficient to occupy every settlement site simultaneously. This forced households to jump between active and abandoned sites, resulting in a significant number of empty settlements (empty rate = 20–60%; Fig 4). By contrast, when agent populations experienced few demographic restrictions (e.g., configurations 14, 15, 22, and 28), the number of settlements grew to vastly exceed the number identified on the real landscape, sometimes reaching 500 before stabilising. A third strategy was also observed in configurations 4 and 24, where households prioritised large migration distances and possessed a limited tolerance to any new settlements within the local environment. The differences between these strategies are most evident through their ability to reproduce the spatial configuration of mounds in the southeastern LM. Although the distance scores for each parameter configuration were minimally affected by the number of settlement agents (Fig 5A), they do exhibit substantial differences depending on the strategy executed by household agents (Fig 5B). Parameter configurations where a greater number of settlement agents were tolerated typically produced greater distance scores than other combinations; under these parameter configurations, it was unlikely that the agent population could fully disperse across the landscape before a sufficient number of sites was produced. This likelihood was further reduced if the maximum migration distance was below 7 km, with the extremely short distances in some configurations forcing *MoundSim Population* to produce localised clusters of settlements and leave large portions of the landscape untouched (Fig 6). Combinations that imposed more significant restrictions on the number of settlements more closely reflected the real landscape, even if short migration distances were employed.

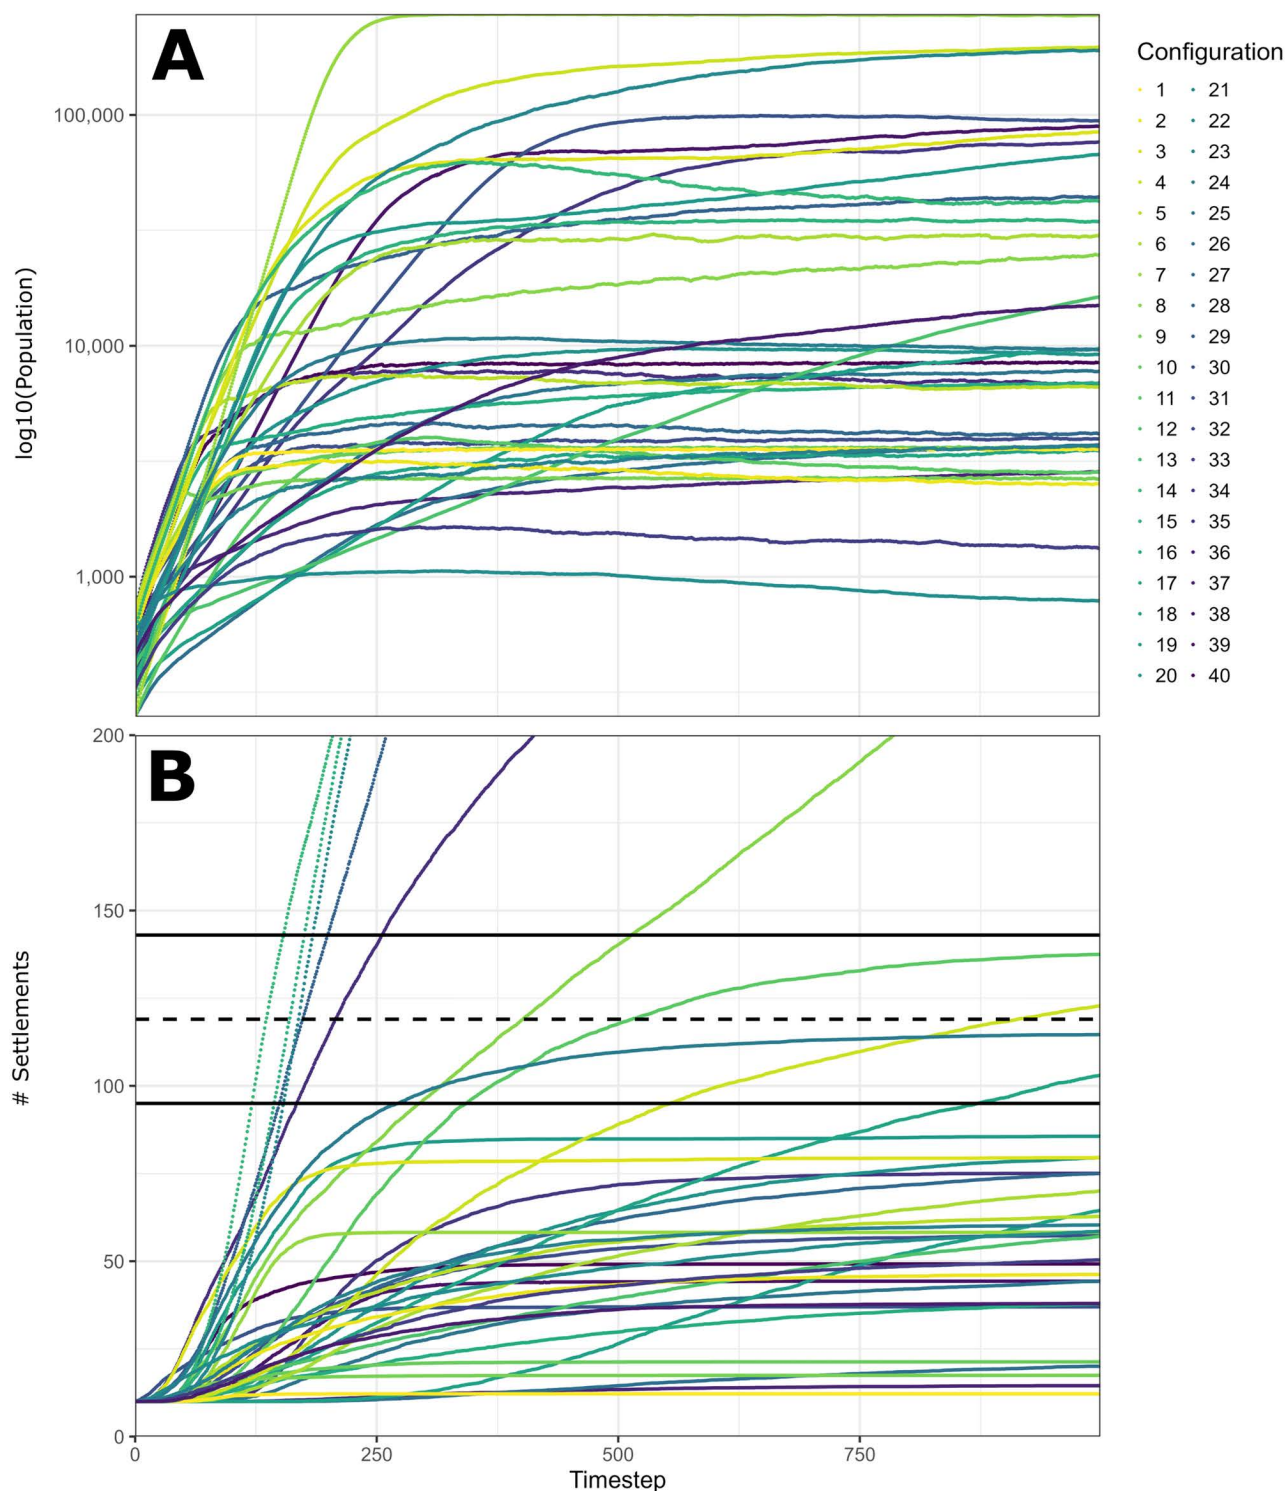

**Fig 3. Graphs displaying the outputs of our agent-based model, MoundSim Population.** (A) Graph displaying the average population estimates during each timestep for parameter combinations tested in MoundSim Population. Each estimate reflects an average of 50 simulation runs. (B) Graph displaying the average number of settlements during each timestep for parameter combinations tested in MoundSim Population. Each estimate reflects an average of 50 simulation runs. Dashed black line reflects the identified number of mounds in the southeastern LM. Solid black lines reflect the 20% settlement threshold required for parameter combinations to be considered successful.

<https://doi.org/10.1371/journal.pone.0325104.g003>



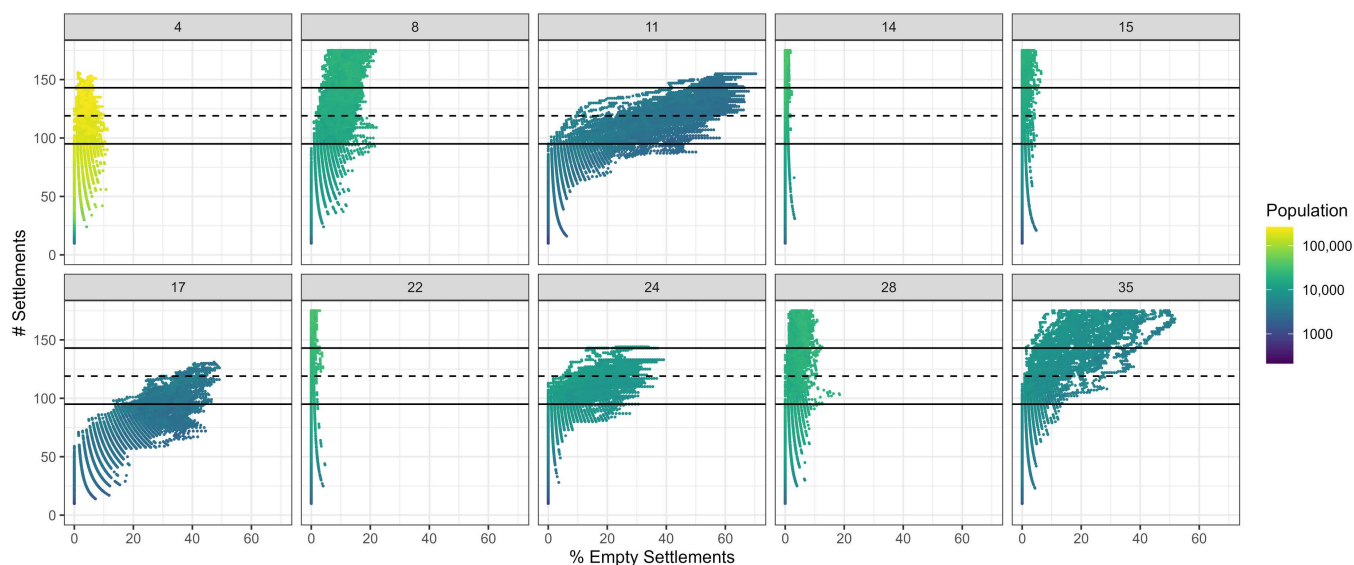

**Fig 4. Successful parameter combinations produced from experiments in MoundSim Population.** Each point reflects a single timestep within each of 50 simulations conducted upon each configuration. The diagram plots the number of settlements (active and abandoned) during that timestep against the proportion of these settlements which are abandoned (possess no household agents). The colour of each point reflects the number of individuals present on the model landscape.

<https://doi.org/10.1371/journal.pone.0325104.g004>

Two characteristics were also found to reduce distance scores regardless of the adopted strategy. Restricting new settlement sites to where nutrient-rich fluvial sediments are located [19] was found to almost eliminate the distance component attached to the mean Y coordinate of settlements on the landscape (see configurations 8, 11, and 17). This indicates our model better approximates the spatial configuration of real mounds if the areas away from this fertile sediment are excluded as suitable settlement sites. Furthermore, the two configurations with the largest migration distances (configurations 4 and 24) produced very low scores for the mean and standard deviation of the distance between a settlement and its nearest neighbour. This indicates that larger migration distances more closely approximate the real landscape.

## Discussion

### Minimum population size

Our energetics estimates demonstrate that the earthworks present in the southeastern LM could have plausibly been constructed by a workforce containing as few as 4500 people. Multiple factors contribute to explaining this surprisingly small value. First, while the largest mounds cover over 20 ha and reach up to 20 m high [18], only 119 of these structures have been identified within our 5020 km<sup>2</sup> study area. For comparison, over 16,000 raised fields have been identified in a region of the northwestern LM less than 1/10<sup>th</sup> of this size (416 km<sup>2</sup>) [87]. Thus, while each raised field is considerably smaller than a settlement mound [13], the amount of earth mobilised per square kilometre (13,000 m<sup>3</sup> km<sup>-2</sup>) is significantly higher than in our study area (9800 m<sup>3</sup> km<sup>-2</sup>). Second, the task of constructing these earthworks was made considerably less labour intensive by building them gradually over the 1000-year period they were occupied [23–25,88]. This occupation period is so long that, even if the earthworks are treated as a community project for which little time is available outside of normal subsistence activities (following [73]), they still would have only required a relatively small workforce. Based on our calculations, and assuming a workforce-to-population ratio of 1:2, it is conceivable that a population of just 9400 could have been responsible for constructing these earthworks. Under this scenario, the Casarabe Culture would have been thinly dispersed across the southeastern LM, with each of the mounds in our study area inhabited, on average, by just 79

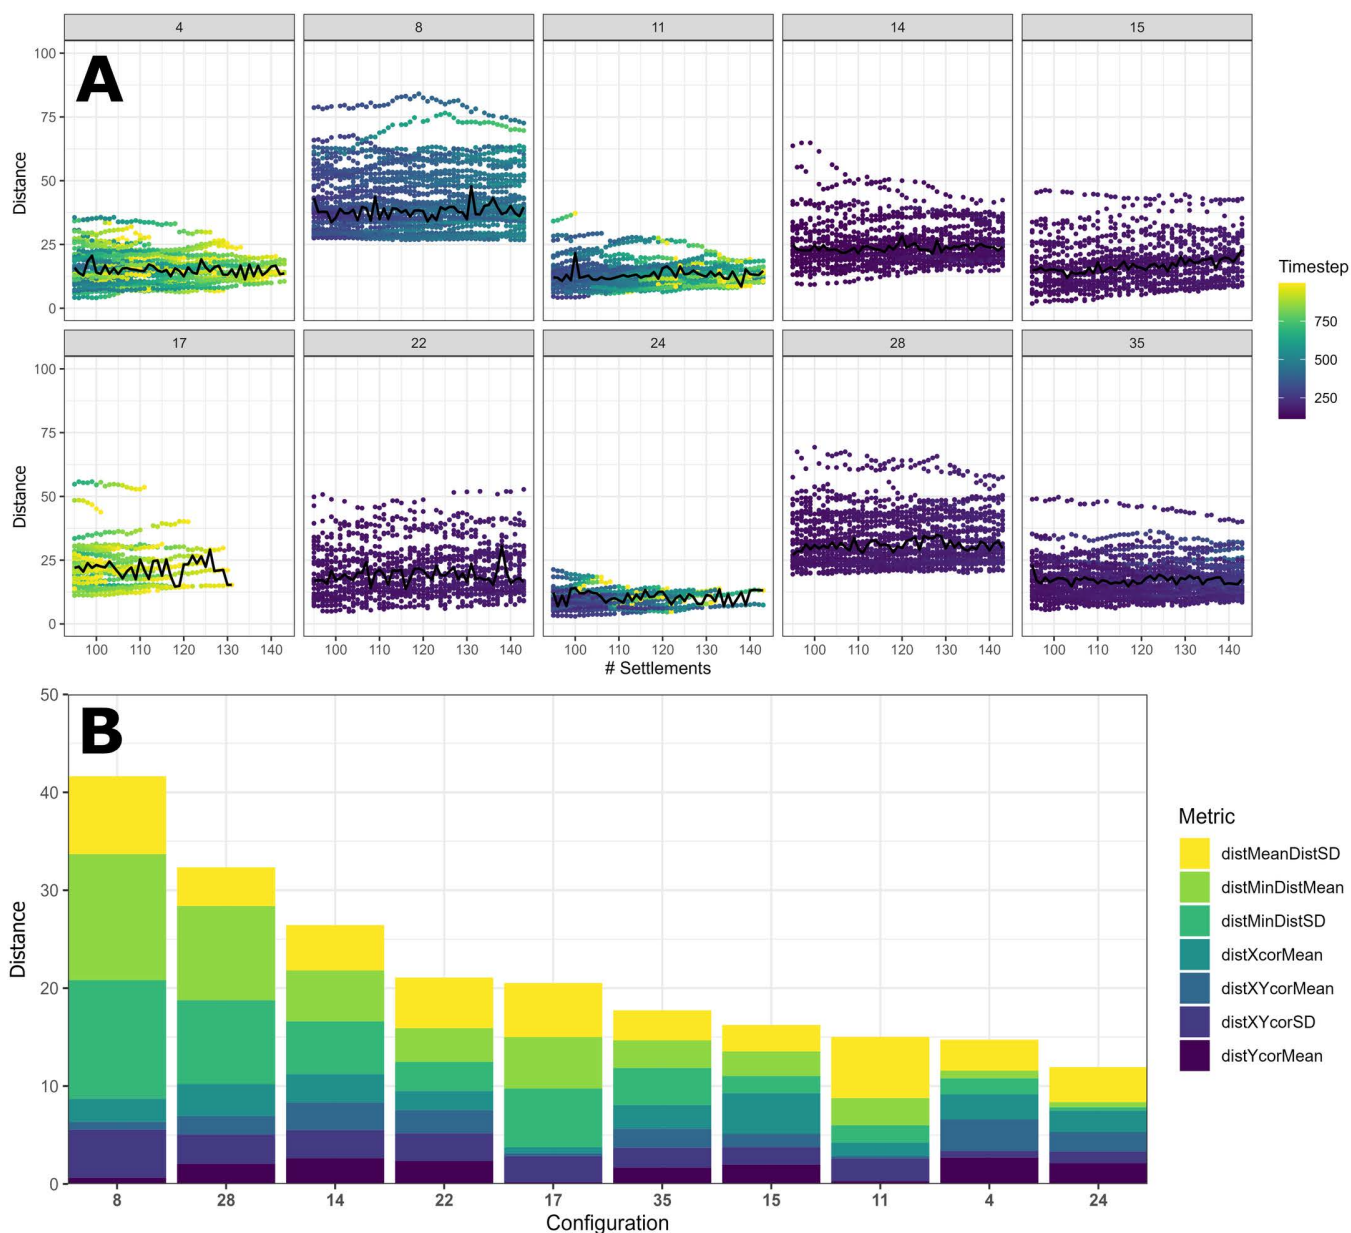

**Fig 5. Distance metric scores for each successful parameter combination produced from experiments conducted upon MoundSim Population** (A) distance metric scores for each timestep from the 50 simulations conducted for each successful parameter combination. Black line reflects the mean distance score calculated from points which possess the same number of settlements as mounds on the real landscape. (B) mean distance metric scores when each parameter combination possesses the same number of mounds as the real landscape (119). This is broken down by component. distMeanDistSD reflects the standard deviation of the mean distance between a settlement and all other settlements on the landscape. distMinDistMean and distMinDistSD represent the mean and standard deviation of the distance between a settlement and its nearest neighbour. distXcorMean and distYcorMean represent the mean x and y coordinates of all settlements. Finally, distXYcorMean and distXYcorSD represents the mean and standard deviation of the distance between all settlements and the mean position of all mounds on the landscape.

<https://doi.org/10.1371/journal.pone.0325104.g005>

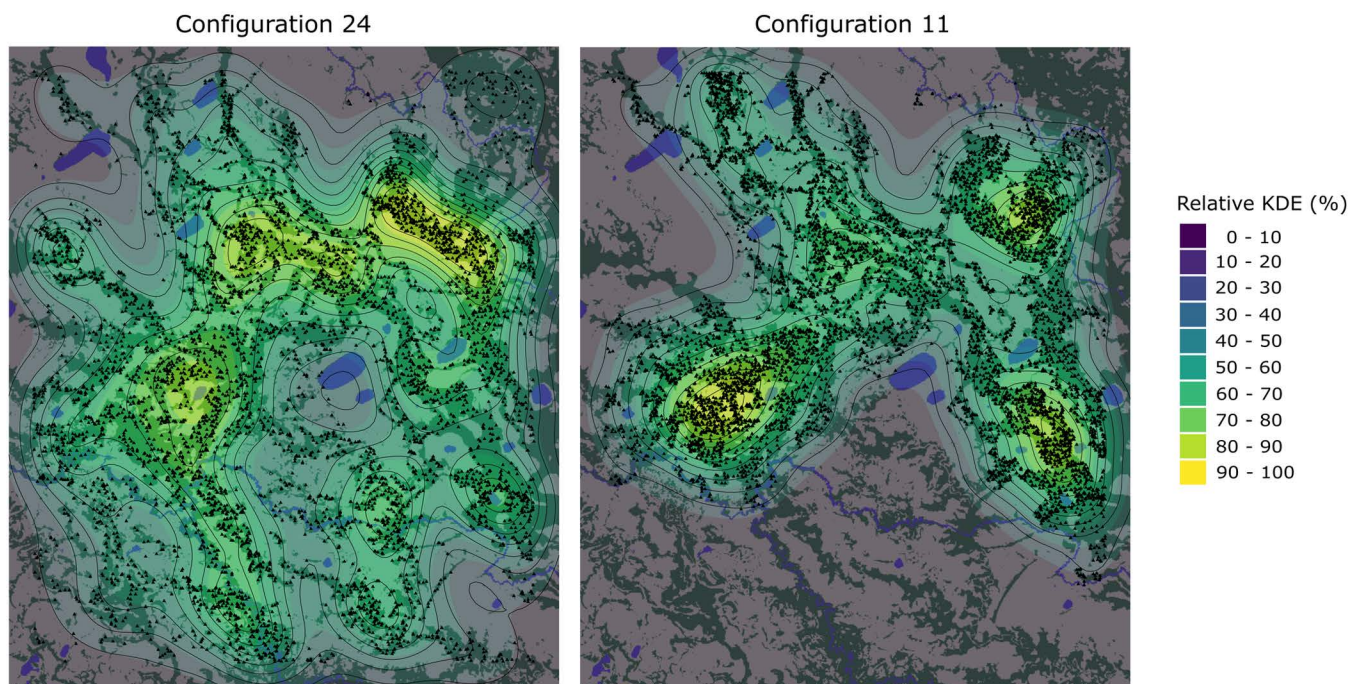

**Fig 6. Combined spatial distribution of population density for the 50 runs performed for parameter configurations 24 and 11.**

<https://doi.org/10.1371/journal.pone.0325104.g006>

people. This echoes previous claims that the culture might have practiced a form of low-density agrarian urbanism [18]. While our results do suggest that a much larger population (up to 60,000) would have been needed if excavation rates were extremely low ( $<0.5 \text{ m}^3 \text{ day}^{-1}$ ), such a scenario is unlikely given the rates recorded at other sites where dense soil was mobilised commonly exceed  $1 \text{ m}^3 \text{ day}^{-1}$  [49,64].

The outputs of *MoundSim Population* show that a sufficient number of settlements could have been produced by fewer people than our minimum energetics estimate of 4500, suggesting that populations as low as 3000 could produce a similar number of settlements to the real landscape. However, these outputs also show that such a low population would be insufficient to inhabit every settlement simultaneously. Instead, household agents were observed to abandon up to 65% of settlement sites, with the remainder being inhabited by between 50 and 60 people. While it has previously been suggested that the mounds were constructed in a spatiotemporally discontinuous fashion [89], inhabited by sedentary communities on a cyclical basis [28], the plausibility of this hypothesis is undermined by the earthworks themselves. The simultaneous occupation of the mounds is clearly demonstrated through them being interconnected by the causeway-canal network [17] and their contemporaneous radiocarbon dates [23–25]. Additionally, it is important to consider the practical benefits of these earthworks. The causeway-canal system, which accounts for one quarter of the mobilised earth, is known to have served an agricultural purpose [17,20]. Modern indigenous groups often arrange themselves into communities larger than the minimum sizes produced by both our energetics model and by *MoundSim Population*, and yet none construct earthworks. Instead, they practice slash-and-burn forest cultivation and avoid the savannas due to poor drainage and weed competition [13,73,80]. Slash-and-burn forest cultivation would have presented significant challenges for the Casarabe Culture, especially given their lack of access to metal tools [90], but it remains difficult to imagine that these challenges exceeded those associated with constructing and maintaining such a large canal network. We therefore consider the notion that an indigenous population of between 3000 and 6000 people was willing and able to construct these earthworks to be unreasonable. Instead, we follow our energetics estimates in arguing the Casarabe Culture grew to a



population of at least 10,000. At this size, the outputs of *MoundSim Population* show that more than 70% of settlements were contemporaneously active, providing an explanation for why they would be integrated into the wider causeway-canal system. As shown in configuration 24, reaching a population of 10,000 was also easily achievable within the known mound occupation period [23–25].

Our minimum population estimate of 10,000 people represents a thirteenfold increase on the smallest population estimate currently available for an equivalent area of the LM (750 people) [40]. This exceeds the 0.2–1 people km<sup>-2</sup> carrying capacity estimates applicable to wider Amazonia, though it should be noted that the population densities of some modern indigenous groups have also exceeded this threshold [26–28]. Our estimates broadly align with the 2 people km<sup>-2</sup> density proposed by Denevan for the wider LM [38] and, in doing so, vindicate his concerns around the intra-regional variability of population estimates [91,92]. Although his figures were intended to reflect an average population density, they fall on the conservative end of our estimates.

### Maximum carrying capacity and resource restriction

Maximum carrying capacity estimates show that our study area could have plausibly supported up to 334,000 people on the basis of maize and fuelwood production. This value is multiple orders of magnitude greater than other published density estimates applicable to the region, and suggests that the southeastern LM was capable of supporting a dense sedentary population prior to European Contact [18,93,94]. Nonetheless, we stress that the maximum carrying capacity of a given environment does not inherently equate to the equilibrium population density actually reached there [95,96]. This notion is supported by the results produced by *MoundSim Population*; of the 40 parameter combinations tested during our experiments, only eight consistently generated population estimates exceeding 100,000 people. Just one of these (configuration 4) also produced a final number of settlements approximating the number of mounds identified on the real landscape. The rarity of our model runs generating populations that exceeded less than one third the size of those produced by our carrying capacity approach, especially given that nearly all terrestrial land patches (97.7%) were within 3 km of a site designated suitable for settlement, suggests that this discrepancy was significant for the Casarabe Culture.

Myriad factors can prevent the population density from reaching this theoretical maximum limit. For instance, we recorded 33% relative reductions in carrying capacity simply by restricting the available resources to those within daily walking distance of the settlement mounds (7 km) [65]. As the mounds are unevenly distributed across our study area, doing this renders 24.4% of the terrestrial land surface inaccessible. It also causes a 4% relative reduction in forested land, which is more valuable given that it can be used both for cultivation and fuelwood extraction. Environmental constraints and preferences can also widen this discrepancy; the clear benefits of open savanna cultivation [20] are exemplified by the doubling of carrying capacity when the savannas are farmed, compared with when cultivation is restricted solely to forested areas. Conversely, forest cultivation forces the choice between exploiting land for agriculture versus fuelwood, given that at least some degree of forest clearance, or thinning, would be necessary due to maize being shade intolerant [97].

It is possible that the values we used to parameterise both our carrying capacity model and *MoundSim Population* may simply underestimate resource supplies on the real landscape. For example, while we calculated palm leaf supplies in *MoundSim Population* based upon the abundant Motacú palm (*Attalea phalerata*) [94,98], other palms found on this landscape, including the spiny palm Murumuru (*Astrocaryum murumuru*), have been used for construction on rare occasions [99] (though this palm is far more commonly exploited for its fruit [73,80,100]). Equally, we must recognise that the real Casarabe Culture may have managed their resources more efficiently than is implemented in *MoundSim Population*. While our model incorporates intra-settlement resource exchange [101], it is likely that the causeway-canal network facilitated inter-settlement trade, which may explain some of the discrepancy between carrying capacity and the actual population reached.

Nonetheless, it is also important to consider our estimates in relation to logistical constraints. Assuming each mound structure possessed an average 5.5-ha surface area [17], the settlement mounds in our study area could collectively



provide a population of 334,000 with just 19.6 m<sup>2</sup> of space *per person*. It is physically possible to live within such a confined space, but there would be little reason for the Casarabe Culture to impose such severe restrictions on themselves instead of further expanding their mounds, particularly given the available labour force. When this is considered alongside the variety of factors that may have prevented the Casarabe Culture from reaching 'maximum' resource use efficiency, we believe it is unlikely that this culture's population exceeded 100,000, and probably reached no more than 50,000 people. Such a population is far more consistent with the existing earthworks, as the mounds within our study area could collectively provide 65.5–130.9 m<sup>2</sup> person<sup>-1</sup> of space. Most of the mound's surface would be occupied under this scenario, but it would also provide sufficient space for communal functions, such as the ceremonial pyramid observed atop some mounds [17,18]. Our model also shows that such a population could be reached within the known occupation period. We therefore consider 50,000–100,000 people to be a reasonable maximum population range for our 5020 km<sup>2</sup> study area.

Representing a density of between 10 and 20 people km<sup>-2</sup>, our maximum population estimates broadly align with Clark Erickson's claim that the medium-sized settlement mound close to Ibiato village was inhabited by between 500 and 1000 people [32]. These values are also similar to the estimates of 6–12.5 people km<sup>-2</sup> proposed for the pre-Columbian settlements of the Upper Xingu [11] and fall on the lower end of population estimates made for the earthworks produced by the Marajoara culture at the mouth of the Amazon [12,102]. More widely, the Casarabe Culture's maximum population is similar to, and even potentially greater than, that of the Mississippian culture of greater Cahokia [103,104], but is much lower than that of the regional-scale urban polities developed by the Maya in Mesoamerica and Greater Angkor in Cambodia, where population density could attain several hundred people per square kilometre [105,106].

## Spatial configuration

The outputs of *MoundSim Population* show that the Casarabe Culture could have employed multiple migration strategies to produce the number of mound settlements seen on the real landscape. These include small, cyclical reoccupation by sedentary communities, rapid expansion driven by a large, unrestricted population, and a gradual deterioration in the creation of new settlements as the settlement density becomes saturated. The first strategy can immediately be excluded given the highly interconnected nature and contemporaneous radiocarbon dates of the mounds [17,23–25]. However, the other strategies cannot be discounted based on the data presented here; both approaches successfully reproduced the number of real settlements, aligning with the concept of equifinality [107,108]. Nonetheless, the distance metric we used to evaluate each successful combination enable us to identify which assumptions produce a more realistic recreation of the southeastern LM.

Chief among these assumptions is migration distance. Although the average distance between a mound and its nearest neighbour on the real landscape is just 2.69 km [17], the two parameter combinations which most accurately reproduced these spatial characteristics (configurations 4, 24) possessed: (i) the largest migration distances of all successful combinations (13.0 and 19.5 km respectively); (ii) agents that prefer to migrate larger distances from their home settlements; and (iii) growth strategies intolerant of large numbers of settlements within the local environment. Combining these characteristics produced average distances of 2.25 and 2.36 km respectively. By contrast, shorter migration distances produced much lower values (lowest=0.8 km), even if the agents preferred migrating large distances. From these observations, we infer that even though the mounds are densely packed, their inhabitants still viewed retaining sufficient land within their local environment as an important priority. This is unsurprising given even small indigenous communities still operate several kilometres away from their home settlement [73,80]. Thus, the outputs of *MoundSim Population* imply that contrary to the strategies characterised by rapid, unrestricted expansion, the mounds in the southeastern LM are likely to have already reached their maximum density. This notion is particularly striking, as previous mapping shows a number of mounds being located in close proximity to one another, with some just 420 m apart [17,18]. Such a small distance raises questions around whether these mounds were simultaneously occupied [89], or why the Casarabe Culture chose to start building a new mound despite an abandoned one being in such close proximity. Our model treats each mound as

an individual settlement, but it is also possible that multiple habitation mounds may form part of a single, larger settlement complex.

Another important characteristic identified within our experiments is whether settlements were restricted only to spawning on the fertile sediments deposited during the late Holocene [19,109]. Under parameter combinations allowing agents to spread unhindered, the mean Y (north-south) position of settlements was 5 km further south than when restricted, causing the 'distYcorMean' component of our distance score to quadruple in value (restricted distance from true value = 1.13 km (n = 3), unrestricted distance 5.66 km (n = 7) respectively). The settlements also dispersed more widely when unrestricted, quintupling the 'distXYcorMean' component score (restricted difference = 0.4 km (n = 3), unrestricted distance = 2.54 km (n = 7) respectively). On this basis, our results corroborate proposals that the Casarabe Culture developed by exploiting these fertile sediments [110]. The spatial configuration cannot be explained through elevation because the southern part of our study area possesses more than sufficient elevated land to enable the Casarabe Culture to settle (see Fig 6). Neither can lower forest cover because, although the proportion of forested land is lower in the south, household agents were restricted to settling in forested locations during 60% of successful parameter combinations. This does not imply that the Casarabe Culture was bound by insurmountable environmental limitations [1,5,6], especially given that some mounds have been found outside the boundaries of the fertile deposits [18]. However, it does suggest that this culture considered the fertile sediment to be an important factor in determining where to settle.

Although we cannot determine the migration strategy used by the Casarabe Culture to settle this landscape, the outputs of our agent-based model suggest that the thousand-year occupation period of the southeastern LM [23–25] was more than sufficient to enable this culture to develop into a large, sedentary society. Household agents were easily capable of producing a sufficient number of settlements to match the real landscape and, in several model runs (e.g., configuration 14), were able to produce enough to surpass this value multiple times over. This prompts the question of whether the final number of settlements on the landscape may have been curtailed in some way. As shown by *MoundSim Population*, internal behavioural factors—such as the desire to migrate larger distances—could certainly have prevented the establishment of settlement mounds. The highly integrated nature and close spacing of the Casarabe Culture's mounds [17] clearly highlights the society's emphasis on internal cooperation, but this does not imply that new settlements in close proximity to existing ones would be tolerated, nor does it rule out the possibility of inter-settlement conflict. The moat and rampart features identified around some of the Casarabe Culture's mounds [18] indicate that, at the very least, defensive structures were necessary to deter conflict.

It is also important not to overlook the potential impacts of external forcing factors. While beneficial for resource exchange, the Casarabe Culture's integrated canal-causeway network [17] would have simultaneously made them more susceptible to epidemic-related depopulation events than other, more dispersed pre-Columbian communities [111,112]. Additionally, as the development of this culture spans the medieval climate anomaly [113,114], it is quite conceivable that climate perturbations either directly or indirectly influenced demographic trends [115,116]. The potential impacts of such drivers have not yet been incorporated into our agent-based model, and is something we plan to address in future work.

### Numbers from nowhere: A note on model limitations

The problems associated with generating past population estimates are well-known and documented [91,92,117,118]. As with all such attempts [4], estimating the Casarabe Culture's population required making numerous assumptions about their behaviour and activities. Some of these assumptions are reasonable even with the limited availability of empirical evidence; for example, the rarity of stone tools [47] and lack of domesticated animals in lowland South America [119,120] makes it safe to assume any earth mobilised by the Casarabe Culture was excavated by wooden digging stick and transported by hand. We can also reasonably estimate the efficiency of these activities because their work rate is very likely to fall within the existing range of values collected from experimental archaeology studies [49]. In other cases, however, we are forced to make assumptions for which no supporting evidence is available. For example, implicit within *MoundSim*

*Population* is the assumption that the Casarabe Culture's growth and spread was driven by demographic expansion. The 1000-year occupation window employed within this study is based upon the radiocarbon dates obtained from just three mounds [23–25] and the regional population size prior to this, between 2000 BCE and 400 CE, is even less certain given much of the region remains unexplored archaeologically [19,109]. A new range of possibilities opens up depending upon the population size during this interim period. The presence of numerous villages would imply the practice of mound building may have spread through cultural diffusion rather than demographic expansion. Alternatively, the absence of prior settlements and the rapid establishment of the Casarabe Culture would point towards them having migrated from elsewhere.

We raise this example to emphasise that the population estimates presented here should be treated as just an initial step to determining the true size of the Casarabe Culture. Much remains to be learned about how this culture operated in terms of practice and behaviour, which could further constrain our models. Unknown factors, such as the initial population size, can substantially influence the resulting trends in population growth, and further empirical research should be undertaken to fill these gaps. For example, it is important to identify how much of each mound was occupied at any one time, how densely packed the people were on these structures, and whether the existing window of mound occupation is truly representative of earthworks in the wider area [23–25]. Moreover, our agent-based model does not yet attempt to recreate the four-stage mound settlement hierarchy identified from recent LiDAR scans [18], additional evidence that may help to determine how the Casarabe Culture spread over time. Nonetheless, despite these acknowledged limitations and caveats, our multifaceted approach has produced the first ever set of plausible, supported population estimates for this culture. We have explicitly defined and quantified the assumptions associated with our methods throughout this article to ensure transparency, and we recommend that any future studies estimating pre-Columbian population sizes are similarly upfront with their inherent assumptions and limitations.

## Conclusions

Our multifaceted modelling approach has enabled us to tentatively constrain the population of the Casarabe Culture to between 10,000 and 100,000 people within a 5020 km<sup>2</sup> area of Amazonian Bolivia. This reflects a substantial improvement upon the existing range of regional estimates (Table 1) that span four orders of magnitude (<1000 to >100,000 people) for our study area [37,40]. Representing a density of between 2 and 20 people km<sup>-2</sup>, our population estimates are similar in magnitude to the claims made for other complex pre-Columbian Amazonian earthmoving cultures, such as those in the Upper Xingu [11] and the Marajoara culture at the Amazon's mouth [12,102]. The latter comparison is especially noteworthy given that the Marajoara are similarly known for constructing large mound earthworks within a forest-savanna mosaic environment [12], though their subsistence strategy, focusing on aquatic resources, stands in contrast to the maize monoculture practiced by the Casarabe Culture in the open savannas [20,102]. However, while the pre-Columbian population density of the southeastern LM was significantly larger than it is today (<1 person km<sup>-2</sup>) [14], the Casarabe Culture remained an order of magnitude smaller than major pre-colonial tropical forest polities beyond Amazonia, such as the Classic Maya and Greater Angkor [105,106]. In fact, at the lower end of our estimated population range, each of the 119 mounds within our study area would have, on average, been inhabited by fewer than 100 people. This population size is smaller than that of some indigenous villages present on the modern landscape [73], corroborating previous claims that this culture might have practiced a form of low-density agrarian urbanism [18,121].

We reiterate that the population estimates presented within this article represent an initial exploratory step to determining the true population size of the Casarabe Culture. Producing these estimates involved making myriad assumptions about the Casarabe Culture's behaviour and agricultural practices. Given that only two mounds have been excavated in any detail [23,47,122] and just two palaeoecological records are currently available for the region [20,21], the models presented here will greatly benefit from additional empirical research as it becomes available. It is also important to emphasise that these estimates solely pertain to the confines of our study area (Fig 1). Scholars have highlighted the challenges of applying population estimates calculated for specific regions to broader areas [91,92,123], and it would be particularly

inappropriate to extrapolate estimates calculated for unique regions, like the one inhabited by the Casarabe Culture, to other parts of the Amazon basin. The seasonally-flooded forest-savanna mosaic vegetation and younger, fertile sediments characteristic of this location significantly influence the demographic trajectory of the populations inhabiting it [19,109,110], but these features are highly atypical of Amazonia as a whole. Nonetheless, we believe that future studies aiming to estimate pre-Columbian population sizes would greatly benefit from adopting a similar kind of transparent, multifaceted approach to the one employed within this article.

## Supporting information

**S1 File. S11 Architectural Energetics.** File containing architectural energetics population estimates for the Casarabe Culture.

(XLSX)

**S2 File. S12 Model Parameters.** File containing the parameters selected for use in MoundSim Population.

(XLSX)

**S3 File. S13 Carrying Capacity.** File containing carrying capacity population estimates for the Casarabe Culture.

(XLSX)

**S4 File. S14 ODD + D: MoundSim Population.** File containing an ‘Overview, Design, Details and Decision Making’ (ODD) description of MoundSim Population.

(PDF)

**S5 File. S15 Imported Model Data.** File containing details on the spatial data imported into MoundSim Population.

(PDF)

**S6 File. S16 LHS Parameters.** File containing the parameter values selected as part of the latin hypercube sampling framework used to test MoundSim Population.

(XLSX)

**S7 File. S17 Extended Results.** File containing extended outputs of MoundSim Population.

(PDF)

## Acknowledgments

We would like to thank Charles Roland Clement and one anonymous reviewer for their comments and suggestions, which helped to improve this manuscript. We thank Nicholas Payette, University of Oxford, for his valuable help in reviewing the code for our agent-based model, as well as the CoHESyS modelling group, University of Oxford, for their advice throughout the development and testing process. We also thank Iza Romanowska, Scott Heckbert, and Mark Lake for their advice following the early stages of agent-based model development, and Lisa Ringhofer for the additional information she provided with regards to the Tsimane indigenous group.

## Author contributions

**Conceptualization:** Joseph Hirst, Joy Singarayer, Francis Mayle.

**Data curation:** Joseph Hirst.

**Formal analysis:** Joseph Hirst.

**Funding acquisition:** Joseph Hirst, Joy Singarayer, Francis Mayle.

**Investigation:** Joseph Hirst, Joy Singarayer.



**Methodology:** Joseph Hirst, Joy Singarayer, Umberto Lombardo.

**Project administration:** Joy Singarayer, Francis Mayle.

**Resources:** Joseph Hirst, Joy Singarayer, Umberto Lombardo, Francis Mayle.

**Software:** Joseph Hirst, Joy Singarayer.

**Supervision:** Joy Singarayer, Umberto Lombardo, Francis Mayle.

**Validation:** Joseph Hirst.

**Visualization:** Joseph Hirst.

**Writing – original draft:** Joseph Hirst.

**Writing – review & editing:** Joseph Hirst, Joy Singarayer, Umberto Lombardo, Francis Mayle.

## References

1. Meggers B. Amazonia: Man and Culture in a Counterfeit Paradise. 2nd ed. Smithsonian Institution Press. 1996.
2. Woods W, Denevan W, Rebellato L. Population estimates for anthropogenically enriched soils. In: Wingard JD, Hayes SE. Soils, climate and society: archaeological investigations in ancient America. 1st ed. Boulder: University Press of Colorado. 2013;19–37.
3. Newson LA. The population of the Amazon basin in 1492: a view from the Ecuadorian headwaters. *Trans Inst Br Geogr.* 1996;21(1):5–26. <https://doi.org/10.2307/622921> PMID: 12157815
4. Koch A, Brierley C, Maslin MM, Lewis SL. Earth system impacts of the European arrival and Great Dying in the Americas after 1492. *Quaternary Science Reviews.* 2019;207:13–36. <https://doi.org/10.1016/j.quascirev.2018.12.004>
5. Meggers B. Environmental limitation on the development of culture. *Am Anthropol.* 1954;12:304–25.
6. Gross DR. Protein Capture and Cultural Development in the Amazon Basin. *American Anthropologist.* 1975;77(3):526–49. <https://doi.org/10.1525/aa.1975.77.3.02a00040>
7. Smith NJH. Anthrosols and human carrying capacity in Amazonia. *Annals of the Association of American Geographers.* 1980;70(4):553–66. <https://doi.org/10.1111/j.1467-8306.1980.tb01332.x>
8. Clement CR. 1492 and the loss of Amazonian crop genetic resources. I. The relation between domestication and human population decline. *Econ Bot.* 1999;53(2):188–202. <https://doi.org/10.1007/bf02866498>
9. Nobre C, Encalada A, Anderson E, Roca Alcazar FH, Bustamante M, Mena C, et al. Amazon Assessment Report 2021. UN Sustainable Development Solutions Network (SDSN). 2021. <https://doi.org/10.55161/rwsx6527>
10. Rostain S, Dorison A, de Saulieu G, Prümers H, Le Pennec J-L, Mejía Mejía F, et al. Two thousand years of garden urbanism in the Upper Amazon. *Science.* 2024;383(6679):183–9. <https://doi.org/10.1126/science.adi6317> PMID: 38207020
11. Heckenberger M, Kuikuro A, Kuikuro U, Russell C, Schmidt M, Fausto C. Amazonia 1492: pristine forest or cultural parkland?. *Science.* 2003;301:1710–4.
12. Roosevelt A. Moundbuilders of the Amazon. Academic Press. 1991.
13. Denevan W. Cultivated landscapes of native Amazonia and the Andes. Oxford University Press. 2001.
14. Instituto Nacional de Estadística de Bolivia. Proyecciones de población. <https://www.ine.gob.bo>. 2022. 2024 January 10.
15. Lombardo U, Canal-Beeby E, Veit H. Eco-archaeological regions in the Bolivian Amazon. *Geogr Helv.* 2012;66(3):173–82. <https://doi.org/10.5194/gh-66-173-2011>
16. Walker J. The Llanos de Mojos. In: Silverman H, Isbell W, editors. *The Handbook of South American Archaeology*. New York, NY.: Springer; 2008. pp. 927–939. doi:10.1007/978-0-387-74907-5\_46
17. Lombardo U, Prümers H. Pre-Columbian human occupation patterns in the eastern plains of the Llanos de Moxos, Bolivian Amazonia. *Journal of Archaeological Science.* 2010;37(8):1875–85. <https://doi.org/10.1016/j.jas.2010.02.011>
18. Prümers H, Betancourt CJ, Iriarte J, Robinson M, Schaich M. Lidar reveals pre-Hispanic low-density urbanism in the Bolivian Amazon. *Nature.* 2022;606(7913):325–8. <https://doi.org/10.1038/s41586-022-04780-4> PMID: 35614221
19. Lombardo U, May J-H, Veit H. Mid- to late-Holocene fluvial activity behind pre-Columbian social complexity in the southwestern Amazon basin. *The Holocene.* 2012;22(9):1035–45. <https://doi.org/10.1177/0959683612437872>
20. Lombardo U, Hilbert L, Bentley M, Bronk Ramsey C, Dudgeon K, Gaitan-Roca A, et al. Maize monoculture supported pre-Columbian urbanism in southwestern Amazonia. *Nature.* 2025;639(8053):119–23. <https://doi.org/10.1038/s41586-024-08473-y> PMID: 39880950
21. Whitney BS, Dickau R, Mayle FE, Soto JD, Iriarte J. Pre-Columbian landscape impact and agriculture in the Monumental Mound region of the Llanos de Moxos, lowland Bolivia. *Quat res.* 2013;80(2):207–17. <https://doi.org/10.1016/j.yqres.2013.06.005>

22. Hermenegildo T, Prümers H, Jaimes Betancourt C, Roberts P, O'Connell TC. Stable isotope evidence for pre-colonial maize agriculture and animal management in the Bolivian Amazon. *Nat Hum Behav.* 2025;9(3):464–71. <https://doi.org/10.1038/s41562-024-02070-9> PMID: [39715871](#)
23. Jaimes Betancourt C. La cerámica de la Loma Salvatierra, Beni-Bolivia. Plural Editores. 2012.
24. Jaimes Betancourt C. La cerámica de la Loma Mendoza. In: Prümers H. Loma Mendoza: Las excavaciones de los años 1999-2002. La Paz: Plural Editores. 2015;89–222.
25. Calandra HA, Salceda SA. Amazonia boliviana: arqueología de los Llanos de Mojos. *Acta Amaz.* 2004;34(2):155–63. <https://doi.org/10.1590/s0044-59672004000200003>
26. Robinson J, Bennett E. Carrying capacity limits to sustainable hunting in tropical forests. *Hunting for sustainability in tropical forests.* New York: Columbia University Press. 2000;13–30.
27. Meggers BJ. Handbook of South American Archaeology. Chungará (Arica). 2011;43(1):147–57. <https://doi.org/10.4067/s0717-73562011000100014>
28. Meggers B. Prehistoric Population Density in the Amazon Basin. In: Verano J, Ubelaker D. Disease and demography in the Americas. Washington: Smithsonian Institution Press. 1992. pp. 197–205.
29. Denevan W. Cattle ranching in the Mojos Savannas of northeastern Bolivia. *Yearbook of the Association of Pacific Coast Geographers.* 1963;25(1):37–44. <https://doi.org/10.1353/pcg.1963.0001>
30. GAB - Gobierno Autonomo del Beni. Plan de Uso del Suelo del Departamento del Beni. 2019. <https://www.beni.gob.bo/>
31. Lombardo U. Pre-Columbian legacy and modern land use in the Bolivian Amazon. *Past Global Changes Magazine.* 2023;31:16–17. <https://doi.org/10.22498/pages.31.1.16>
32. Mann CC. Earthmovers of the Amazon. *Science.* 2000;287(5454):786–9. <https://doi.org/10.1126/science.287.5454.786>
33. Olson DM, Dinerstein E, Wikramanayake ED, Burgess ND, Powell GVN, Underwood EC, et al. Terrestrial Ecoregions of the World: A New Map of Life on Earth. *BioScience.* 2001;51(11):933. [https://doi.org/10.1641/0006-3568\(2001\)051\[0933:teotwa\]2.0.co;2](https://doi.org/10.1641/0006-3568(2001)051[0933:teotwa]2.0.co;2)
34. Hirst J, Raczka M, Lombardo U, Chavez E, Becerra-Valdivia L, Bentley M, et al. Localised land-use and maize agriculture by the pre-Columbian Casarabe Culture in Lowland Bolivia. *The Holocene.* 2025. <https://doi.org/10.1177/09596836251332794>
35. Lizarazu J de. Informaciones hechas por Don Juan de Lizarazu sobre el descubrimiento de Mojos. *Maurtua.* 9:124–216.
36. Denevan W. The aboriginal cultural geography of the Llanos de Mojos of Bolivia. University of California Press. 1966.
37. Lombardo U. Estimating the pre-Columbian population of southwestern Amazonia. In: *The 81st Annual Meeting of the Society for American Archaeology.* tDAR id: 429243.
38. Denevan W. The native population of the Americas in 1492. 2nd ed. University of Wisconsin Press. 1992.
39. Métraux A. The native tribes of eastern Bolivia and western Matto Grosso. Smithsonian Institution: Bureau of American Ethnology. 1942.
40. Steward J. The native population of South America. *Handbook of South American Indians.* 1st ed. Washington, D.C.: Bureau of American Ethnology. 1949;655–68.
41. Steward J, Faron L. Native peoples of South America. McGraw-Hill. 1959.
42. Hamilton SK, Sippel SJ, Melack JM. Seasonal inundation patterns in two large savanna floodplains of South America: the Llanos de Moxos (Bolivia) and the Llanos del Orinoco (Venezuela and Colombia). *Hydrological Processes.* 2004;18(11):2103–16. <https://doi.org/10.1002/hyp.5559>
43. Hanagarth W. Acerca de la geoecología de las sabanas del Beni en el noreste de Bolivia. Instituto de Ecología. 1993.
44. Mayle FE, Langstroth RP, Fisher RA, Meir P. Long-term forest-savannah dynamics in the Bolivian Amazon: implications for conservation. *Philos Trans R Soc Lond B Biol Sci.* 2007;362(1478):291–307. <https://doi.org/10.1098/rstb.2006.1987> PMID: [17255037](#)
45. Langstroth Plotkin R. Biogeography of the Llanos de Moxos: natural and anthropogenic determinants. *Geogr Helv.* 2012;66(3):183–92. <https://doi.org/10.5194/gh-66-183-2011>
46. Prümers H. Hügel umgeben von schönen monstern: Ausgrabungen in der Loma Mendoza (Bolivien). *Expeditionen in vergessene welten: 25 jahre archäologische forschungen in afrika, amerika und asien.* 2004;47–78.
47. Prümers H. Loma Mendoza: Las excavaciones de los años 1999-2002. La Paz: Plural Editores. 2015.
48. Lombardo U, Denier S, May J-H, Rodrigues L, Veit H. Human–environment interactions in pre-Columbian Amazonia: The case of the Llanos de Moxos, Bolivia. *Quaternary International.* 2013;312:109–19. <https://doi.org/10.1016/j.quaint.2013.01.007>
49. Abrams E, McCurdy L. Massive assumptions and moundbuilders: the history, method and relevance of architectural energetics. In: McCurdy L, Abrams E. *Architectural energetics in archaeology: analytical expansions and global explorations.* London: Routledge. 2019;1–25.
50. Abrams E, Bolland T. Architectural energetics, ancient monuments and operations management. *J Archaeol Method Theory.* 1999;6:263–91. <https://doi.org/10.1023/A>
51. Rees W. Ecological footprints and appropriated carrying capacity: what urban economics leaves out. *Environ Urban.* 1992;4:121–30.
52. Cohen JE. Population growth and earth's human carrying capacity. *Science.* 1995;269(5222):341–6. <https://doi.org/10.1126/science.7618100> PMID: [7618100](#)
53. Fearnside P. Human carrying capacity of the Brazilian rainforest. 1st ed. New York: Columbia University Press. 1986.
54. Bruno M. Carbonized plant remains from Loma Salvatierra, Department of Beni, Bolivia. *Z Archäol Außereurop Kult.* 2010;3:153–208.

55. Magliocca NR, Ellis EC. Evolving human landscapes: a virtual laboratory approach. *Journal of Land Use Science*. 2016;11(6):642–71. <https://doi.org/10.1080/1747423x.2016.1241314>
56. Cegielski WH, Rogers JD. Rethinking the role of agent-based modeling in archaeology. *Journal of Anthropological Archaeology*. 2016;41:283–98. <https://doi.org/10.1016/j.jaa.2016.01.009>
57. Canal-Beeby E. Aquaculture and rural livelihoods in the Bolivian Amazon-Systems of innovation and pro-poor technology development. University of East Anglia. 2012.
58. Erasmus CJ. Monument building: some field experiments. *Southwestern Journal of Anthropology*. 1965;21(4):277–301. <https://doi.org/10.1086/soutjanth.21.4.3629433>
59. ECAFE. Manual Labour and Its More Effective Use in Competition with Machines for Earthwork in the ECAFE Region. Manila: United Nations; 1957;1689–1699.
60. Aaberg S, Bonsignore J. A consideration of time and labor expenditure in the construction process at the Teotihuacan pyramid of the sun and the Poverty Point mound. Three papers on Mesoamerican archaeology. 1975;40–79.
61. Pandolf KB, Givoni B, Goldman RF. Predicting energy expenditure with loads while standing or walking very slowly. *J Appl Physiol Respir Environ Exerc Physiol*. 1977;43(4):577–81. <https://doi.org/10.1152/jappl.1977.43.4.577> PMID: 908672
62. Pimental NA, Pandolf KB. Energy expenditure while standing or walking slowly uphill or downhill with loads. *Ergonomics*. 1979;22(8):963–73. <https://doi.org/10.1080/00140137908924670> PMID: 527574
63. Soule RG, Goldman RF. Terrain coefficients for energy cost prediction. *J Appl Physiol*. 1972;32(5):706–8. <https://doi.org/10.1152/jappl.1972.32.5.706> PMID: 5038861
64. Ortmann AL, Kidder TR. Building Mound A at Poverty Point, Louisiana: Monumental public architecture, ritual practice, and implications for hunter-gatherer complexity. *Geoarchaeology*. 2012;28(1):66–86. <https://doi.org/10.1002/gea.21430>
65. Beckerman S. Swidden in Amazonia and the Amazon Rim. In: Turner II B, Brush S. Comparative farming systems. New York: The Guilford Press. 1987;55–94.
66. Fearnside P. An estimate of carrying capacity of the Osa peninsula for human populations supported on a shifting agriculture technology. Organization for Tropical Studies. 1972.
67. WHO. Energy and protein requirements. Geneva: World Health Organisation; 1985. <https://www.fao.org/3/aa040e/AA040E00.htm#TOC>
68. Bruno M. Macrorestos botánicos de la Loma Mendoza. In: Prümers H. Loma Mendoza: Las excavaciones de los años 1999-2002. La Paz: Plural Editores. 2015;285–96.
69. Dickau R, Bruno MC, Iriarte J, Prümers H, Jaimes Betancourt C, Holst I, et al. Diversity of cultivars and other plant resources used at habitation sites in the Llanos de Mojos, Beni, Bolivia: evidence from macrobotanical remains, starch grains, and phytoliths. *Journal of Archaeological Science*. 2012;39(2):357–70. <https://doi.org/10.1016/j.jas.2011.09.021>
70. Kennett DJ, Prufer KM, Culleton BJ, George RJ, Robinson M, Trask WR, et al. Early isotopic evidence for maize as a staple grain in the Americas. *Sci Adv*. 2020;6(23):eaba3245. <https://doi.org/10.1126/sciadv.aba3245> PMID: 32537504
71. Nuss ET, Tanumihardjo SA. Maize: a paramount staple crop in the context of global nutrition. *Compr Rev Food Sci Food Saf*. 2010;9(4):417–36. <https://doi.org/10.1111/j.1541-4337.2010.00117.x> PMID: 33467836
72. United States Department of Agriculture U. Food data central database. <https://fdc.nal.usda.gov/index.html>. 2019. 2021 May 12.
73. Ringhofer L. Fishing, Foraging and Farming in the Bolivian Amazon. Springer Netherlands. 2010. <https://doi.org/10.1007/978-90-481-3487-8>
74. Wood TS, Baldwin S. Fuelwood and charcoal use in developing countries. *Annu Rev Energy*. 1985;10(1):407–29. <https://doi.org/10.1146/annurev.eg.10.110185.002203>
75. Grimm V, Berger U, Bastiansen F, Eliassen S, Ginot V, Giske J, et al. A standard protocol for describing individual-based and agent-based models. *Ecological Modelling*. 2006;198(1–2):115–26. <https://doi.org/10.1016/j.ecolmodel.2006.04.023>
76. Müller B, Bohn F, Dreßler G, Groeneveld J, Klassert C, Martin R, et al. Describing human decisions in agent-based models - ODD+D, an extension of the ODD protocol. *Environmental Modelling and Software*. 2013;48: 37–48. <https://doi.org/10.1016/j.envsoft.2013.06.003>
77. Wilensky U. NetLogo. Center for Connected Learning and Computer-Based Modeling Northwestern University. 1999.
78. Gigerenzer G, Selten R. Bounded rationality: The adaptive toolbox. Cambridge: MIT Press. 2001.
79. Simon HA. A behavioral model of rational choice. *The Quarterly Journal of Economics*. 1955;69(1):99. <https://doi.org/10.2307/1884852>
80. Holmberg A. Nomads of the long bow: The Siriono of eastern Bolivia. Washington D.C.: Smithsonian Institution Institute of Social Anthropology. 1969.
81. Binford L. Constructing frames of reference: An analytical method for archaeological theory building using ethnographic and environmental data sets. 1st ed. University of California Press. 2001.
82. Chamberlain A. Demography in archaeology. Cambridge: Cambridge University Press. 2006.
83. Gurven M, Kaplan H, Supa AZ. Mortality experience of Tsimane Amerindians of Bolivia: regional variation and temporal trends. *Am J Hum Biol*. 2007;19(3):376–98. <https://doi.org/10.1002/ajhb.20600> PMID: 17421012

84. McKay MD, Beckman RJ, Conover WJ. A comparison of three methods for selecting values of input variables in the analysis of output from a computer code. *Technometrics*. 2000;42(1):55–61. <https://doi.org/10.1080/00401706.2000.10485979>
85. Thiele JC, Kurth W, Grimm V. Facilitating parameter estimation and sensitivity analysis of agent-based models: A cookbook using NetLogo and “R”. *JASSS*. 2014;17(3). <https://doi.org/10.18564/jasss.2503>
86. Staver C. Why farmers rotate fields in maize-cassava-plantain bush fallow agriculture in the wet Peruvian Amazon. *Hum Ecol*. 1989;17(4):401–26. <https://doi.org/10.1007/bf00889498>
87. Lombardo U. Raised fields of northwestern Bolivia: a GIS based analysis. *Z Archäol Außereurop Kult*. 2010;3:127–49.
88. Erickson C. Lomas de Ocupación en los Llanos de Moxos. *Arqueología de las Tierras Bajas*. 2000;207–26.
89. Meggers B. Natural versus anthropogenic sources of Amazonian biodiversity: the continuing quest for El Dorado. In: Bradshaw G, Marquet P, editors. *How landscapes change: human disturbance and ecosystem fragmentation in the Americas*. New York: Springer. 2003;89–103.
90. Denevan W. Stone vs metal axes: the ambiguity of shifting cultivation in prehistoric Amazonia. *J Steward Anthropol Soc*. 1992;20:153–65.
91. Denevan WM. Estimating amazonian indian numbers in 1492. *Iag*. 2014;13(2):207–21. <https://doi.org/10.1353/lag.2014.0036>
92. Denevan WM. The native population of Amazonia in 1492 reconsidered. *Rev Indias*. 2003;63(227):175–88. <https://doi.org/10.3989/revindias.2003.i227.557>
93. Balee W, Erickson C. The domesticated landscapes of the Bolivian Amazon. *Time and complexity in historical ecology: studies in the neotropical lowlands*. New York, NY: Colombian University Press. 2006;234–78.
94. Erickson C, Balée W. The historical ecology of a complex landscape in Bolivia. *Time and complexity in historical ecology: Studies in the neotropical lowlands*. New York: Columbia University Press. 2006;187–233.
95. Hui C. Carrying Capacity of the Environment. *International Encyclopedia of the Social & Behavioral Sciences*. Elsevier. 2015;155–60. <https://doi.org/10.1016/b978-0-08-097086-8.91002-x>
96. Hui C. Carrying capacity, population equilibrium, and environment's maximal load. *Ecological Modelling*. 2006;192(1–2):317–20. <https://doi.org/10.1016/j.ecolmodel.2005.07.001>
97. Gao J, Liu Z, Zhao B, Dong S, Liu P, Zhang J. Shade stress decreased maize grain yield, dry matter, and nitrogen accumulation. *Agronomy Journal*. 2020;112(4):2768–76. <https://doi.org/10.1002/agj2.20140>
98. Townsend W. *Living on the edge: Siriono hunting and fishing in lowland Bolivia*. University of Florida. 1995.
99. Smith N. *Palms and people in the Amazon*. 1st ed. Cham: Springer. 2015.
100. Moraes R. M, Sarmiento J, Oviedo E. Richness and uses in a diverse palm site in Bolivia. *Biodivers Conserv*. 1995;4(7):719–27. <https://doi.org/10.1007/bf00158865>
101. Sahlins M. *Stone age economics*. 1st ed. Chicago: Aldine Atherton Inc. 1972.
102. Schaan D. *Sacred geographies of ancient Amazonia: historical ecology of social complexity*. 2nd ed. Walnut Creek: Left Coast Press. 2016.
103. Pauketat TR. Resettled farmers and the making of a Mississippian polity. *Am antiq*. 2003;68(1):39–66. <https://doi.org/10.2307/3557032>
104. Hedman K, Emerson T, Fort M, Lambert J, Betzenhauser A, Pauketat T. Corn, climate, and the human population of Greater Cahokia. In: Cook R, Comstock A. *Following the Mississippian Spread: Climate Change and Migration in the Eastern US (ca AD 1000-1600)*. Cham: Springer; 2022;37–63. [doi:10.1007/978-3-030-89082-7\\_2](https://doi.org/10.1007/978-3-030-89082-7_2)
105. Canuto MA, Estrada-Belli F, Garrison TG, Houston SD, Acuña MJ, Kováč M, et al. Ancient lowland Maya complexity as revealed by airborne laser scanning of northern Guatemala. *Science*. 2018;361(6409):eaau0137. <https://doi.org/10.1126/science.aau0137> PMID: 30262469
106. Klassen S, Carter AK, Evans DH, Orman S, Stark MT, Loyless AA, et al. Diachronic modeling of the population within the medieval Greater Angkor Region settlement complex. *Sci Adv*. 2021;7(19):eabf8441. <https://doi.org/10.1126/sciadv.abf8441> PMID: 33962951
107. Premo L. Equifinality and explanation: The role of agent-based modeling in postpositivist archaeology. In: Costopoulos A, Lake M. *Simulating change: archaeology into the twenty-first century*. Salt Lake City: University of Utah Press. 2010;28–37.
108. O'Sullivan D, Perry G. *Spatial simulation: exploring pattern and process*. Oxford: Wiley. 2013.
109. Lombardo U, Rodrigues L, Veit H. Alluvial plain dynamics and human occupation in SW Amazonia during the Holocene: A paleosol-based reconstruction. *Quaternary Science Reviews*. 2018;180:30–41. <https://doi.org/10.1016/j.quascirev.2017.11.026>
110. Lombardo U, Denier S, Veit H. Soil properties and pre-Columbian settlement patterns in the Monumental Mounds Region of the Llanos de Moxos, Bolivian Amazon. *SOIL*. 2015;1(1):65–81. <https://doi.org/10.5194/soil-1-65-2015>
111. Dobyns HF. Disease transfer at contact. *Annu Rev Anthropol*. 1993;22(1):273–91. <https://doi.org/10.1146/annurev.an.22.100193.001421>
112. Walker RS, Sattenspiel L, Hill KR. Mortality from contact-related epidemics among indigenous populations in Greater Amazonia. *Sci Rep*. 2015;5:14032. <https://doi.org/10.1038/srep14032> PMID: 26354026
113. Novello VF, Vuille M, Cruz FW, Strikis NM, de Paula MS, Edwards RL, et al. Centennial-scale solar forcing of the South American Monsoon System recorded in stalagmites. *Sci Rep*. 2016;6:24762. <https://doi.org/10.1038/srep24762> PMID: 27097590
114. Della Libera ME, Novello VF, Cruz FW, Orrison R, Vuille M, Maezumi SY, et al. Paleoclimatic and paleoenvironmental changes in Amazonian lowlands over the last three millennia. *Quaternary Science Reviews*. 2022;279:107383. <https://doi.org/10.1016/j.quascirev.2022.107383>

115. de Souza JG, Robinson M, Maezumi SY, Capriles J, Hoggarth JA, Lombardo U, et al. Climate change and cultural resilience in late pre-Columbian Amazonia. *Nat Ecol Evol*. 2019;3(7):1007–17. <https://doi.org/10.1038/s41559-019-0924-0> PMID: [31209292](https://pubmed.ncbi.nlm.nih.gov/31209292/)
116. Meggers B. Judging the future by the past: the impact of environmental instability on prehistoric Amazonian populations. In: Sponsel L. *Indigenous peoples and the future of Amazonia: an ecological anthropology of an endangered world*. London: University of Arizona Press. 1995;15–44.
117. Henige D. Recent work and prospects in American Indian contact population. *History Compass*. 2007;6(1):183–206. <https://doi.org/10.1111/j.1478-0542.2007.00490.x>
118. Henige D. *Numbers from nowhere: The American Indian contact population debate*. University of Oklahoma Press. 1998.
119. Stahl PW. Animal domestication in South America. 1st ed. In: Silverman H, Isbell WH. *The Handbook of South American Archaeology*. 1st ed. New York: Springer; 2008;121–130. [doi:10.1007/978-0-387-74907-5\\_8](https://doi.org/10.1007/978-0-387-74907-5_8)
120. vondenDriesch A, Hutterer R. Mazamas, patos criollos y anguilas de lodo. *Z Archäol Außereurop Kult*. 2011;4:341–67.
121. Fletcher R. Low-density, agrarian-based urbanism: a comparative view. *Insights*. 2009;2:1–19.
122. Prümers H. Der Wall führt zum see. Die Ausgrabungen 2005–2006 in der Loma Salvatierra (Bolivien). *Z Archäol Außereurop Kult*. 2007;2:371–9.
123. Lovell G. *Historical Demography*. 1st ed. In: WinklerPrins A, Mathewson K. *Forest Field and Fallow*. 1st ed. Cham: Springer; 2021;1–8.
